# Supplementary material for: Transcriptome Analyses Reveal IL6/Stat3 Signaling Involvement in Radial Glia Proliferation After Stab Wound Injury in the Adult Zebrafish Optic Tectum
Source: Front Cell Dev Biol. 2021 Apr 30;9:668408. doi: 10.3389/fcell.2021.668408 (PMC8119998; doi:10.3389/fcell.2021.668408)
Supplement: Supplementary file 3 [file Table_3.XLSX]

## Sheet: 12hpi_up_GO
GroupID	Category	Term	Description	LogP	Log(q-value)	InTerm_InList	Genes	Symbols
1_Summary	GO Biological Processes	GO:0006955	immune response	-17.3673	-13.611	73/543	30255,140747,321046,321453,334724,337413,368615,393611,403127,403135,403138,403139,405770,405825,406471,445073,445318,497629,541514,550475,553366,553377,553957,554157,555232,555357,556440,556770,557258,560966,561001,562475,563803,567444,570830,570832,723996,768172,768248,791140,791973,792160,792472,792585,794635,794891,795785,100002946,100003859,100003896,100003911,100007521,100034480,100101460,1…	tfa,cxcr4a,c3a.1,ctsla,anxa1a,stat6,mhc2b,c6,tlr1,tlr22,tlr5a,tlr5b,il1b,mfap4,tnfrsf1a,socs1a,nrros,kitb,hhla2a.1,ctsk,ccr9a,prg4b,il10,ctss2.1,ptk6a,ifi44f1,si:dkey-15j16.3,gpr183a,ptk2ba,si:ch211-158d24.4,cd83,c7a,ccr12a,irak3,vsir,c7b,tnfaip8l2a,zgc:153911,fas,cd276,cxcr3.2,irf1b,cfbl,ccr12b.1,c4b,ccl19a.1,cxcl18b,cxcl8a,cxcl8b.3,ccl34a.3,cxcl19,socs1b,si:ch211-188c18.1,hcst,zgc:174863,ccl34a…
1_Member	GO Biological Processes	GO:0006955	immune response	-17.3673	-13.611	73/543	30255,140747,321046,321453,334724,337413,368615,393611,403127,403135,403138,403139,405770,405825,406471,445073,445318,497629,541514,550475,553366,553377,553957,554157,555232,555357,556440,556770,557258,560966,561001,562475,563803,567444,570830,570832,723996,768172,768248,791140,791973,792160,792472,792585,794635,794891,795785,100002946,100003859,100003896,100003911,100007521,100034480,100101460,1…	tfa,cxcr4a,c3a.1,ctsla,anxa1a,stat6,mhc2b,c6,tlr1,tlr22,tlr5a,tlr5b,il1b,mfap4,tnfrsf1a,socs1a,nrros,kitb,hhla2a.1,ctsk,ccr9a,prg4b,il10,ctss2.1,ptk6a,ifi44f1,si:dkey-15j16.3,gpr183a,ptk2ba,si:ch211-158d24.4,cd83,c7a,ccr12a,irak3,vsir,c7b,tnfaip8l2a,zgc:153911,fas,cd276,cxcr3.2,irf1b,cfbl,ccr12b.1,c4b,ccl19a.1,cxcl18b,cxcl8a,cxcl8b.3,ccl34a.3,cxcl19,socs1b,si:ch211-188c18.1,hcst,zgc:174863,ccl34a…
1_Member	GO Biological Processes	GO:0006952	defense response	-17.2789	-13.611	65/446	30255,30767,246227,334724,337413,337514,368917,378966,393386,393387,393608,402837,403127,403135,403138,403139,404039,405770,405825,406397,406471,415151,436979,445073,445318,449557,450028,494109,503594,553612,553957,555232,557258,559020,559080,567444,570410,571584,678516,723996,791973,792160,792613,794891,795096,795305,795785,100002292,100002946,100003859,100003896,100003911,100005416,100005593,10…	tfa,stat3,ptgs2a,anxa1a,stat6,mpx,adam8a,ncf1,cybb,ggt1a,ptger2a,hamp,tlr1,tlr22,tlr5a,tlr5b,npsn,il1b,mfap4,mmp9,tnfrsf1a,rac2,lygl1,socs1a,nrros,saa,dram1,ch25h,il4r.1,mpeg1.2,il10,ptk6a,ptk2ba,ptgs2b,cftr,irak3,ptger2b,marco,tnfaip6,tnfaip8l2a,cxcr3.2,irf1b,zgc:195173,ccl19a.1,ifit16,acod1,cxcl18b,si:ch73-63e15.2,cxcl8a,cxcl8b.3,ccl34a.3,cxcl19,ptger4b,adam8b,socs1b,ccl34a.4,cd40,ccl34b.8,ccl3…
1_Member	GO Biological Processes	GO:0006954	inflammatory response	-12.9645	-9.94985	36/194	246227,334724,337514,368917,393387,393608,403127,403138,403139,405770,406397,406471,445318,449557,503594,559020,570410,678516,792613,794891,795785,100002292,100002946,100003859,100003896,100003911,100005416,100005593,100170820,100270764,100331911,100331978,100536594,100537869,101885910,102997062	ptgs2a,anxa1a,mpx,adam8a,ggt1a,ptger2a,tlr1,tlr5a,tlr5b,il1b,mmp9,tnfrsf1a,nrros,saa,il4r.1,ptgs2b,ptger2b,tnfaip6,zgc:195173,ccl19a.1,cxcl18b,si:ch73-63e15.2,cxcl8a,cxcl8b.3,ccl34a.3,cxcl19,ptger4b,adam8b,ccl34a.4,cd40,ccl34b.8,ccl34b.9,cxcl8b.1,ccl39.7,si:ch211-112c15.8,il1fma
1_Member	GO Biological Processes	GO:0045087	innate immune response	-4.34837	-2.31396	24/225	337413,403127,403135,403138,403139,405825,406471,445073,445318,555232,557258,567444,723996,791973,794891,100003896,100007521,100170820,100270764,100331911,100331978,100537869,100538070,101885596	stat6,tlr1,tlr22,tlr5a,tlr5b,mfap4,tnfrsf1a,socs1a,nrros,ptk6a,ptk2ba,irak3,tnfaip8l2a,cxcr3.2,ccl19a.1,ccl34a.3,socs1b,ccl34a.4,cd40,ccl34b.8,ccl34b.9,ccl39.7,si:ch1073-110a20.2,hck
2_Summary	GO Biological Processes	GO:0043207	response to external biotic stimulus	-16.7596	-13.3928	53/317	30255,140814,327320,336933,337514,368242,378848,378966,393387,393939,402837,403135,403138,403139,404039,405770,406397,406459,406463,406471,415151,436979,445410,449557,450028,494109,541514,550369,553612,553957,556440,559080,567278,571584,791973,792160,792472,794053,795096,795305,795785,100002946,100003859,100003911,100037357,100126017,100270764,100331911,100331978,100536137,100536356,100536594,100…	tfa,cebpb,f5,rhogb,mpx,kmo,hspa5,ncf1,ggt1a,atf3,hamp,tlr22,tlr5a,tlr5b,npsn,il1b,mmp9,zgc:77112,nfkbiaa,tnfrsf1a,rac2,lygl1,il12a,saa,dram1,ch25h,hhla2a.1,nsdhl,mpeg1.2,il10,si:dkey-15j16.3,cftr,lect2l,marco,cxcr3.2,irf1b,cfbl,il13,ifit16,acod1,cxcl18b,cxcl8a,cxcl8b.3,cxcl19,tnfrsf1b,gpr84,cd40,ccl34b.8,ccl34b.9,si:ch211-241b2.5,si:dkey-15j16.6,cxcl8b.1,ccl39.7,tp53,casp8,apela
2_Member	GO Biological Processes	GO:0043207	response to external biotic stimulus	-16.7596	-13.3928	53/317	30255,140814,327320,336933,337514,368242,378848,378966,393387,393939,402837,403135,403138,403139,404039,405770,406397,406459,406463,406471,415151,436979,445410,449557,450028,494109,541514,550369,553612,553957,556440,559080,567278,571584,791973,792160,792472,794053,795096,795305,795785,100002946,100003859,100003911,100037357,100126017,100270764,100331911,100331978,100536137,100536356,100536594,100…	tfa,cebpb,f5,rhogb,mpx,kmo,hspa5,ncf1,ggt1a,atf3,hamp,tlr22,tlr5a,tlr5b,npsn,il1b,mmp9,zgc:77112,nfkbiaa,tnfrsf1a,rac2,lygl1,il12a,saa,dram1,ch25h,hhla2a.1,nsdhl,mpeg1.2,il10,si:dkey-15j16.3,cftr,lect2l,marco,cxcr3.2,irf1b,cfbl,il13,ifit16,acod1,cxcl18b,cxcl8a,cxcl8b.3,cxcl19,tnfrsf1b,gpr84,cd40,ccl34b.8,ccl34b.9,si:ch211-241b2.5,si:dkey-15j16.6,cxcl8b.1,ccl39.7
2_Member	GO Biological Processes	GO:0051707	response to other organism	-16.7596	-13.3928	53/317	30255,140814,327320,336933,337514,368242,378848,378966,393387,393939,402837,403135,403138,403139,404039,405770,406397,406459,406463,406471,415151,436979,445410,449557,450028,494109,541514,550369,553612,553957,556440,559080,567278,571584,791973,792160,792472,794053,795096,795305,795785,100002946,100003859,100003911,100037357,100126017,100270764,100331911,100331978,100536137,100536356,100536594,100…	tfa,cebpb,f5,rhogb,mpx,kmo,hspa5,ncf1,ggt1a,atf3,hamp,tlr22,tlr5a,tlr5b,npsn,il1b,mmp9,zgc:77112,nfkbiaa,tnfrsf1a,rac2,lygl1,il12a,saa,dram1,ch25h,hhla2a.1,nsdhl,mpeg1.2,il10,si:dkey-15j16.3,cftr,lect2l,marco,cxcr3.2,irf1b,cfbl,il13,ifit16,acod1,cxcl18b,cxcl8a,cxcl8b.3,cxcl19,tnfrsf1b,gpr84,cd40,ccl34b.8,ccl34b.9,si:ch211-241b2.5,si:dkey-15j16.6,cxcl8b.1,ccl39.7
2_Member	GO Biological Processes	GO:0009607	response to biotic stimulus	-16.5157	-13.2458	53/321	30255,140814,327320,336933,337514,368242,378848,378966,393387,393939,402837,403135,403138,403139,404039,405770,406397,406459,406463,406471,415151,436979,445410,449557,450028,494109,541514,550369,553612,553957,556440,559080,567278,571584,791973,792160,792472,794053,795096,795305,795785,100002946,100003859,100003911,100037357,100126017,100270764,100331911,100331978,100536137,100536356,100536594,100…	tfa,cebpb,f5,rhogb,mpx,kmo,hspa5,ncf1,ggt1a,atf3,hamp,tlr22,tlr5a,tlr5b,npsn,il1b,mmp9,zgc:77112,nfkbiaa,tnfrsf1a,rac2,lygl1,il12a,saa,dram1,ch25h,hhla2a.1,nsdhl,mpeg1.2,il10,si:dkey-15j16.3,cftr,lect2l,marco,cxcr3.2,irf1b,cfbl,il13,ifit16,acod1,cxcl18b,cxcl8a,cxcl8b.3,cxcl19,tnfrsf1b,gpr84,cd40,ccl34b.8,ccl34b.9,si:ch211-241b2.5,si:dkey-15j16.6,cxcl8b.1,ccl39.7
2_Member	GO Biological Processes	GO:0009617	response to bacterium	-12.4329	-9.50535	38/223	30255,140814,327320,336933,337514,393387,402837,403135,403138,403139,404039,405770,406397,406471,415151,436979,445410,449557,450028,541514,553612,553957,556440,559080,567278,571584,791973,792472,794053,795305,795785,100002946,100003859,100003911,100126017,100536137,100536356,100536594	tfa,cebpb,f5,rhogb,mpx,ggt1a,hamp,tlr22,tlr5a,tlr5b,npsn,il1b,mmp9,tnfrsf1a,rac2,lygl1,il12a,saa,dram1,hhla2a.1,mpeg1.2,il10,si:dkey-15j16.3,cftr,lect2l,marco,cxcr3.2,cfbl,il13,acod1,cxcl18b,cxcl8a,cxcl8b.3,cxcl19,gpr84,si:ch211-241b2.5,si:dkey-15j16.6,cxcl8b.1
2_Member	GO Biological Processes	GO:0051704	multi-organism process	-9.98718	-7.24873	56/505	30255,30590,58022,140814,327320,336933,337514,368242,378848,378966,393387,393939,402837,403135,403138,403139,404039,405770,406397,406459,406463,406471,415151,436979,445410,449557,450028,494109,541514,550369,553612,553957,556440,559080,567278,571584,791973,792160,792472,794053,795096,795305,795785,100002946,100003859,100003911,100037357,100126017,100270764,100331911,100331978,100536023,100536137,1…	tfa,tp53,casp8,cebpb,f5,rhogb,mpx,kmo,hspa5,ncf1,ggt1a,atf3,hamp,tlr22,tlr5a,tlr5b,npsn,il1b,mmp9,zgc:77112,nfkbiaa,tnfrsf1a,rac2,lygl1,il12a,saa,dram1,ch25h,hhla2a.1,nsdhl,mpeg1.2,il10,si:dkey-15j16.3,cftr,lect2l,marco,cxcr3.2,irf1b,cfbl,il13,ifit16,acod1,cxcl18b,cxcl8a,cxcl8b.3,cxcl19,tnfrsf1b,gpr84,cd40,ccl34b.8,ccl34b.9,apela,si:ch211-241b2.5,si:dkey-15j16.6,cxcl8b.1,ccl39.7
2_Member	GO Biological Processes	GO:0098542	defense response to other organism	-4.42766	-2.36725	20/167	30255,378966,402837,403138,403139,404039,405770,406471,415151,436979,450028,494109,553612,553957,559080,571584,792160,795096,795305,100270764	tfa,ncf1,hamp,tlr5a,tlr5b,npsn,il1b,tnfrsf1a,rac2,lygl1,dram1,ch25h,mpeg1.2,il10,cftr,marco,irf1b,ifit16,acod1,cd40
2_Member	GO Biological Processes	GO:0042742	defense response to bacterium	-3.6748	-1.86267	15/120	30255,402837,403138,403139,404039,405770,406471,415151,436979,450028,553612,553957,559080,571584,795305	tfa,hamp,tlr5a,tlr5b,npsn,il1b,tnfrsf1a,rac2,lygl1,dram1,mpeg1.2,il10,cftr,marco,acod1
3_Summary	GO Biological Processes	GO:0002682	regulation of immune system process	-15.6941	-12.5034	55/358	30117,30481,280650,321046,327284,334724,336933,337591,337597,368917,393387,393611,394108,403127,403135,403138,403139,405825,406397,406463,406471,415151,436895,445073,497629,541514,556440,557258,559080,560193,560339,562475,567444,570830,570832,751704,767678,768172,791140,792160,792472,794635,100001936,100002946,100005593,100007521,100037357,100101460,100136852,100270764,100321723,100331428,1005361…	spi1b,gata1a,klf6a,c3a.1,lgals9l3,anxa1a,rhogb,fam49ba,lgals9l1,adam8a,ggt1a,c6,stk10,tlr1,tlr22,tlr5a,tlr5b,mfap4,mmp9,nfkbiaa,tnfrsf1a,rac2,irf8,socs1a,kitb,hhla2a.1,si:dkey-15j16.3,ptk2ba,cftr,il34,tfpi2,c7a,irak3,vsir,c7b,spi1a,cish,zgc:153911,cd276,irf1b,cfbl,c4b,bcl6ab,cxcl8a,adam8b,socs1b,tnfrsf1b,hcst,zgc:174863,cd40,si:dkey-192g7.3,c3a.4,si:ch211-241b2.5,si:dkey-15j16.6,si:ch1073-110a20.…
3_Member	GO Biological Processes	GO:0002682	regulation of immune system process	-15.6941	-12.5034	55/358	30117,30481,280650,321046,327284,334724,336933,337591,337597,368917,393387,393611,394108,403127,403135,403138,403139,405825,406397,406463,406471,415151,436895,445073,497629,541514,556440,557258,559080,560193,560339,562475,567444,570830,570832,751704,767678,768172,791140,792160,792472,794635,100001936,100002946,100005593,100007521,100037357,100101460,100136852,100270764,100321723,100331428,1005361…	spi1b,gata1a,klf6a,c3a.1,lgals9l3,anxa1a,rhogb,fam49ba,lgals9l1,adam8a,ggt1a,c6,stk10,tlr1,tlr22,tlr5a,tlr5b,mfap4,mmp9,nfkbiaa,tnfrsf1a,rac2,irf8,socs1a,kitb,hhla2a.1,si:dkey-15j16.3,ptk2ba,cftr,il34,tfpi2,c7a,irak3,vsir,c7b,spi1a,cish,zgc:153911,cd276,irf1b,cfbl,c4b,bcl6ab,cxcl8a,adam8b,socs1b,tnfrsf1b,hcst,zgc:174863,cd40,si:dkey-192g7.3,c3a.4,si:ch211-241b2.5,si:dkey-15j16.6,si:ch1073-110a20.2
3_Member	GO Biological Processes	GO:0002684	positive regulation of immune system process	-8.13021	-5.57628	32/233	321046,334724,337591,368917,393611,403127,403135,403138,403139,405825,406397,415151,445073,541514,556440,560193,562475,567444,570832,768172,791140,792472,794635,100005593,100037357,100136852,100270764,100321723,100331428,100536137,100536356,100538070	c3a.1,anxa1a,fam49ba,adam8a,c6,tlr1,tlr22,tlr5a,tlr5b,mfap4,mmp9,rac2,socs1a,hhla2a.1,si:dkey-15j16.3,il34,c7a,irak3,c7b,zgc:153911,cd276,cfbl,c4b,adam8b,tnfrsf1b,zgc:174863,cd40,si:dkey-192g7.3,c3a.4,si:ch211-241b2.5,si:dkey-15j16.6,si:ch1073-110a20.2
3_Member	GO Biological Processes	GO:0050776	regulation of immune response	-5.80308	-3.48739	26/211	321046,334724,393611,403127,403135,403138,403139,405825,445073,497629,562475,567444,570830,570832,768172,791140,792160,792472,794635,100007521,100101460,100136852,100270764,100321723,100331428,100538070	c3a.1,anxa1a,c6,tlr1,tlr22,tlr5a,tlr5b,mfap4,socs1a,kitb,c7a,irak3,vsir,c7b,zgc:153911,cd276,irf1b,cfbl,c4b,socs1b,hcst,zgc:174863,cd40,si:dkey-192g7.3,c3a.4,si:ch1073-110a20.2
3_Member	GO Biological Processes	GO:0001816	cytokine production	-4.98681	-2.80323	15/93	327284,334724,337597,403127,403138,403139,445318,567444,768172,791140,100001936,100136852,100188894,100270764,100321723	lgals9l3,anxa1a,lgals9l1,tlr1,tlr5a,tlr5b,nrros,irak3,zgc:153911,cd276,bcl6ab,zgc:174863,il4,cd40,si:dkey-192g7.3
3_Member	GO Biological Processes	GO:0001817	regulation of cytokine production	-4.37793	-2.33702	13/81	327284,334724,337597,403127,403138,403139,567444,768172,791140,100001936,100136852,100270764,100321723	lgals9l3,anxa1a,lgals9l1,tlr1,tlr5a,tlr5b,irak3,zgc:153911,cd276,bcl6ab,zgc:174863,cd40,si:dkey-192g7.3
3_Member	GO Biological Processes	GO:0002253	activation of immune response	-4.37658	-2.33702	19/155	321046,393611,403127,403135,403138,403139,405825,562475,567444,570832,768172,791140,792472,794635,100136852,100270764,100321723,100331428,100538070	c3a.1,c6,tlr1,tlr22,tlr5a,tlr5b,mfap4,c7a,irak3,c7b,zgc:153911,cd276,cfbl,c4b,zgc:174863,cd40,si:dkey-192g7.3,c3a.4,si:ch1073-110a20.2
3_Member	GO Biological Processes	GO:0050778	positive regulation of immune response	-3.93371	-2.04399	20/181	321046,334724,393611,403127,403135,403138,403139,405825,562475,567444,570832,768172,791140,792472,794635,100136852,100270764,100321723,100331428,100538070	c3a.1,anxa1a,c6,tlr1,tlr22,tlr5a,tlr5b,mfap4,c7a,irak3,c7b,zgc:153911,cd276,cfbl,c4b,zgc:174863,cd40,si:dkey-192g7.3,c3a.4,si:ch1073-110a20.2
3_Member	GO Biological Processes	GO:0002755	MyD88-dependent toll-like receptor signaling pathway	-3.04515	-1.39815	4/11	403127,403138,403139,567444	tlr1,tlr5a,tlr5b,irak3
3_Member	GO Biological Processes	GO:0050708	regulation of protein secretion	-2.38309	-0.870552	6/36	403127,403138,403139,751668,100003895,100270764	tlr1,tlr5a,tlr5b,gck,arfip1,cd40
3_Member	GO Biological Processes	GO:0002221	pattern recognition receptor signaling pathway	-2.32213	-0.823051	6/37	403127,403135,403138,403139,567444,100270764	tlr1,tlr22,tlr5a,tlr5b,irak3,cd40
3_Member	GO Biological Processes	GO:0002758	innate immune response-activating signal transduction	-2.32213	-0.823051	6/37	403127,403135,403138,403139,567444,100270764	tlr1,tlr22,tlr5a,tlr5b,irak3,cd40
3_Member	GO Biological Processes	GO:0045088	regulation of innate immune response	-2.25051	-0.770158	8/63	403127,403135,403138,403139,445073,567444,100007521,100270764	tlr1,tlr22,tlr5a,tlr5b,socs1a,irak3,socs1b,cd40
3_Member	GO Biological Processes	GO:0002791	regulation of peptide secretion	-2.20667	-0.730525	6/39	403127,403138,403139,751668,100003895,100270764	tlr1,tlr5a,tlr5b,gck,arfip1,cd40
3_Member	GO Biological Processes	GO:0031349	positive regulation of defense response	-2.16727	-0.698054	7/52	403127,403135,403138,403139,406397,567444,100270764	tlr1,tlr22,tlr5a,tlr5b,mmp9,irak3,cd40
3_Member	GO Biological Processes	GO:0002218	activation of innate immune response	-2.15192	-0.686811	6/40	403127,403135,403138,403139,567444,100270764	tlr1,tlr22,tlr5a,tlr5b,irak3,cd40
3_Member	GO Biological Processes	GO:0050663	cytokine secretion	-2.11247	-0.667317	3/10	403127,403138,403139	tlr1,tlr5a,tlr5b
3_Member	GO Biological Processes	GO:0050707	regulation of cytokine secretion	-2.11247	-0.667317	3/10	403127,403138,403139	tlr1,tlr5a,tlr5b
4_Summary	GO Biological Processes	GO:0050900	leukocyte migration	-14.9276	-11.8038	32/133	30685,325599,334724,336933,368917,387293,393551,394108,402857,405770,406471,415151,445073,449557,494109,556770,557258,559080,791973,794891,795785,100002946,100003859,100003896,100003911,100005593,100170820,100331911,100331978,100536594,100537869,100884146,140747,373105,553366,563803,792585,30767,337413,368326,393387,406650,436923,497629,565104,567257,567444,571368,777651,797527,799475,100006778,1…	aanat2,lgals3b,anxa1a,rhogb,adam8a,mmp13a,cyba,stk10,s1pr4,il1b,tnfrsf1a,rac2,socs1a,saa,ch25h,gpr183a,ptk2ba,cftr,cxcr3.2,ccl19a.1,cxcl18b,cxcl8a,cxcl8b.3,ccl34a.3,cxcl19,adam8b,ccl34a.4,ccl34b.8,ccl34b.9,cxcl8b.1,ccl39.7,selplg,cxcr4a,rab13,ccr9a,ccr12a,ccr12b.1,stat3,stat6,il13ra2,ggt1a,timp2b,crlf1a,kitb,lifrb,f3a,irak3,ifngr1,il10ra,crfb4,il13ra1,il6st,socs1b,il6r,il15ra,cd40,il12rb2l,bmp2a,…
4_Member	GO Biological Processes	GO:0050900	leukocyte migration	-14.9276	-11.8038	32/133	30685,325599,334724,336933,368917,387293,393551,394108,402857,405770,406471,415151,445073,449557,494109,556770,557258,559080,791973,794891,795785,100002946,100003859,100003896,100003911,100005593,100170820,100331911,100331978,100536594,100537869,100884146	aanat2,lgals3b,anxa1a,rhogb,adam8a,mmp13a,cyba,stk10,s1pr4,il1b,tnfrsf1a,rac2,socs1a,saa,ch25h,gpr183a,ptk2ba,cftr,cxcr3.2,ccl19a.1,cxcl18b,cxcl8a,cxcl8b.3,ccl34a.3,cxcl19,adam8b,ccl34a.4,ccl34b.8,ccl34b.9,cxcl8b.1,ccl39.7,selplg
4_Member	GO Biological Processes	GO:0060326	cell chemotaxis	-14.2054	-11.1396	30/123	30685,140747,325599,334724,373105,387293,393551,402857,405770,406471,415151,494109,553366,556770,557258,559080,563803,791973,792585,794891,795785,100002946,100003859,100003896,100003911,100170820,100331911,100331978,100536594,100537869	aanat2,cxcr4a,lgals3b,anxa1a,rab13,mmp13a,cyba,s1pr4,il1b,tnfrsf1a,rac2,ch25h,ccr9a,gpr183a,ptk2ba,cftr,ccr12a,cxcr3.2,ccr12b.1,ccl19a.1,cxcl18b,cxcl8a,cxcl8b.3,ccl34a.3,cxcl19,ccl34a.4,ccl34b.8,ccl34b.9,cxcl8b.1,ccl39.7
4_Member	GO Biological Processes	GO:0030595	leukocyte chemotaxis	-12.7552	-9.78629	25/95	30685,325599,334724,387293,393551,402857,405770,406471,415151,494109,556770,557258,559080,791973,794891,795785,100002946,100003859,100003896,100003911,100170820,100331911,100331978,100536594,100537869	aanat2,lgals3b,anxa1a,mmp13a,cyba,s1pr4,il1b,tnfrsf1a,rac2,ch25h,gpr183a,ptk2ba,cftr,cxcr3.2,ccl19a.1,cxcl18b,cxcl8a,cxcl8b.3,ccl34a.3,cxcl19,ccl34a.4,ccl34b.8,ccl34b.9,cxcl8b.1,ccl39.7
4_Member	GO Biological Processes	GO:0034097	response to cytokine	-11.9945	-9.10474	33/177	30767,334724,337413,368326,393387,405770,406650,436923,445073,497629,565104,567257,567444,571368,777651,791973,794891,795785,797527,799475,100003859,100003896,100003911,100006778,100007521,100135755,100170820,100192216,100270764,100331911,100331978,100537869,110437721	stat3,anxa1a,stat6,il13ra2,ggt1a,il1b,timp2b,crlf1a,socs1a,kitb,lifrb,f3a,irak3,ifngr1,il10ra,cxcr3.2,ccl19a.1,cxcl18b,crfb4,il13ra1,cxcl8b.3,ccl34a.3,cxcl19,il6st,socs1b,il6r,ccl34a.4,il15ra,cd40,ccl34b.8,ccl34b.9,ccl39.7,il12rb2l
4_Member	GO Biological Processes	GO:0071345	cellular response to cytokine stimulus	-11.3941	-8.53913	30/155	30767,337413,368326,405770,436923,445073,497629,565104,567257,567444,571368,777651,791973,794891,795785,797527,799475,100003859,100003896,100003911,100006778,100007521,100135755,100170820,100192216,100270764,100331911,100331978,100537869,110437721	stat3,stat6,il13ra2,il1b,crlf1a,socs1a,kitb,lifrb,f3a,irak3,ifngr1,il10ra,cxcr3.2,ccl19a.1,cxcl18b,crfb4,il13ra1,cxcl8b.3,ccl34a.3,cxcl19,il6st,socs1b,il6r,ccl34a.4,il15ra,cd40,ccl34b.8,ccl34b.9,ccl39.7,il12rb2l
4_Member	GO Biological Processes	GO:0019221	cytokine-mediated signaling pathway	-11.0983	-8.27557	29/149	30767,337413,368326,405770,436923,445073,497629,565104,567257,567444,571368,777651,791973,794891,795785,797527,799475,100003859,100003896,100003911,100006778,100007521,100135755,100170820,100192216,100331911,100331978,100537869,110437721	stat3,stat6,il13ra2,il1b,crlf1a,socs1a,kitb,lifrb,f3a,irak3,ifngr1,il10ra,cxcr3.2,ccl19a.1,cxcl18b,crfb4,il13ra1,cxcl8b.3,ccl34a.3,cxcl19,il6st,socs1b,il6r,ccl34a.4,il15ra,ccl34b.8,ccl34b.9,ccl39.7,il12rb2l
4_Member	GO Biological Processes	GO:0097529	myeloid leukocyte migration	-10.2971	-7.5323	24/111	30685,325599,334724,336933,387293,393551,402857,405770,406471,415151,449557,559080,791973,794891,795785,100002946,100003859,100003896,100003911,100170820,100331911,100331978,100536594,100537869	aanat2,lgals3b,anxa1a,rhogb,mmp13a,cyba,s1pr4,il1b,tnfrsf1a,rac2,saa,cftr,cxcr3.2,ccl19a.1,cxcl18b,cxcl8a,cxcl8b.3,ccl34a.3,cxcl19,ccl34a.4,ccl34b.8,ccl34b.9,cxcl8b.1,ccl39.7
4_Member	GO Biological Processes	GO:0097530	granulocyte migration	-9.82888	-7.11525	22/98	30685,325599,334724,336933,393551,402857,405770,406471,415151,449557,559080,794891,795785,100002946,100003859,100003896,100003911,100170820,100331911,100331978,100536594,100537869	aanat2,lgals3b,anxa1a,rhogb,cyba,s1pr4,il1b,tnfrsf1a,rac2,saa,cftr,ccl19a.1,cxcl18b,cxcl8a,cxcl8b.3,ccl34a.3,cxcl19,ccl34a.4,ccl34b.8,ccl34b.9,cxcl8b.1,ccl39.7
4_Member	GO Biological Processes	GO:0071310	cellular response to organic substance	-9.694	-7.02308	71/737	30631,30671,30767,246227,321837,325423,334724,337413,359834,368326,373105,378848,393608,394148,402837,402843,403079,405770,406473,436923,445073,445318,493181,497629,541514,556440,559020,559080,560210,560638,560743,563150,563884,565104,565295,567257,567444,569142,570410,571368,571948,777651,791580,791973,793937,794053,794891,795785,797527,799475,100002272,100002946,100003859,100003896,100003911,10…	bmp2a,hsp70.3,stat3,ptgs2a,keap1a,fstl1a,anxa1a,stat6,tgfb1a,il13ra2,rab13,hspa5,ptger2a,cyp7a1,hamp,sfrp1a,igfbp3,il1b,pck2,crlf1a,socs1a,nrros,fgf7,kitb,hhla2a.1,si:dkey-15j16.3,ptgs2b,cftr,hsp70l,si:ch73-21k16.1,lpxn,nr1d4a,tgfb1b,lifrb,cers2b,f3a,irak3,entpd2b,ptger2b,ifngr1,nr1d4b,il10ra,hspb8,cxcr3.2,agtrap,il13,ccl19a.1,cxcl18b,crfb4,il13ra1,dusp22b,cxcl8a,cxcl8b.3,ccl34a.3,cxcl19,ptger4b,…
4_Member	GO Biological Processes	GO:1990266	neutrophil migration	-9.64978	-7.0031	21/91	30685,325599,336933,393551,402857,405770,406471,415151,449557,559080,794891,795785,100002946,100003859,100003896,100003911,100170820,100331911,100331978,100536594,100537869	aanat2,lgals3b,rhogb,cyba,s1pr4,il1b,tnfrsf1a,rac2,saa,cftr,ccl19a.1,cxcl18b,cxcl8a,cxcl8b.3,ccl34a.3,cxcl19,ccl34a.4,ccl34b.8,ccl34b.9,cxcl8b.1,ccl39.7
4_Member	GO Biological Processes	GO:0071621	granulocyte chemotaxis	-9.2204	-6.61323	19/78	30685,325599,334724,402857,405770,406471,415151,559080,794891,795785,100002946,100003859,100003896,100003911,100170820,100331911,100331978,100536594,100537869	aanat2,lgals3b,anxa1a,s1pr4,il1b,tnfrsf1a,rac2,cftr,ccl19a.1,cxcl18b,cxcl8a,cxcl8b.3,ccl34a.3,cxcl19,ccl34a.4,ccl34b.8,ccl34b.9,cxcl8b.1,ccl39.7
4_Member	GO Biological Processes	GO:0030593	neutrophil chemotaxis	-9.07352	-6.48784	18/71	30685,325599,402857,405770,406471,415151,559080,794891,795785,100002946,100003859,100003896,100003911,100170820,100331911,100331978,100536594,100537869	aanat2,lgals3b,s1pr4,il1b,tnfrsf1a,rac2,cftr,ccl19a.1,cxcl18b,cxcl8a,cxcl8b.3,ccl34a.3,cxcl19,ccl34a.4,ccl34b.8,ccl34b.9,cxcl8b.1,ccl39.7
4_Member	GO Biological Processes	GO:0016477	cell migration	-7.26878	-4.79124	63/711	30685,30744,30767,140747,280650,325599,334724,336504,336617,336933,359834,368917,373105,386787,387293,393551,394108,394125,402857,405770,406272,406397,406471,406658,415151,415252,445073,449557,493181,494109,497629,544666,553366,556770,557258,559080,560743,562273,563803,566945,568593,573655,791973,792585,794891,795785,796481,797491,100002946,100003859,100003896,100003911,100005593,100005849,100170…	aanat2,cbfb,stat3,cxcr4a,klf6a,lgals3b,anxa1a,arpc5a,thy1,rhogb,tgfb1a,adam8a,rab13,itga5,mmp13a,cyba,stk10,rhoca,s1pr4,il1b,sema6d,mmp9,tnfrsf1a,cnn2,rac2,eaf2,socs1a,saa,fgf7,ch25h,kitb,ptges,ccr9a,gpr183a,ptk2ba,cftr,lpxn,plxnc1,ccr12a,mmp14b,sdc4,rhof,cxcr3.2,ccr12b.1,ccl19a.1,cxcl18b,selp,itgb7,cxcl8a,cxcl8b.3,ccl34a.3,cxcl19,adam8b,rhov,ccl34a.4,cd40,ccl34b.8,ccl34b.9,itgb6,apela,cxcl8b.1,c…
4_Member	GO Biological Processes	GO:0048870	cell motility	-7.0889	-4.65941	66/768	30685,30744,30767,140747,280650,325599,327292,334724,336504,336617,336933,337132,359834,368917,373105,386787,387293,393551,394108,394125,402857,403001,405770,406272,406397,406471,406658,415151,415252,445073,449557,493181,494109,497629,544666,553366,556770,557258,559080,560743,562273,563803,566945,568593,573655,791973,792585,794891,795785,796481,797491,100002946,100003859,100003896,100003911,10000…	aanat2,cbfb,stat3,cxcr4a,klf6a,lgals3b,tpte,anxa1a,arpc5a,thy1,rhogb,anxa5b,tgfb1a,adam8a,rab13,itga5,mmp13a,cyba,stk10,rhoca,s1pr4,cfl2,il1b,sema6d,mmp9,tnfrsf1a,cnn2,rac2,eaf2,socs1a,saa,fgf7,ch25h,kitb,ptges,ccr9a,gpr183a,ptk2ba,cftr,lpxn,plxnc1,ccr12a,mmp14b,sdc4,rhof,cxcr3.2,ccr12b.1,ccl19a.1,cxcl18b,selp,itgb7,cxcl8a,cxcl8b.3,ccl34a.3,cxcl19,adam8b,rhov,ccl34a.4,cd40,ccl34b.8,ccl34b.9,itgb6…
4_Member	GO Biological Processes	GO:0051674	localization of cell	-7.0889	-4.65941	66/768	30685,30744,30767,140747,280650,325599,327292,334724,336504,336617,336933,337132,359834,368917,373105,386787,387293,393551,394108,394125,402857,403001,405770,406272,406397,406471,406658,415151,415252,445073,449557,493181,494109,497629,544666,553366,556770,557258,559080,560743,562273,563803,566945,568593,573655,791973,792585,794891,795785,796481,797491,100002946,100003859,100003896,100003911,10000…	aanat2,cbfb,stat3,cxcr4a,klf6a,lgals3b,tpte,anxa1a,arpc5a,thy1,rhogb,anxa5b,tgfb1a,adam8a,rab13,itga5,mmp13a,cyba,stk10,rhoca,s1pr4,cfl2,il1b,sema6d,mmp9,tnfrsf1a,cnn2,rac2,eaf2,socs1a,saa,fgf7,ch25h,kitb,ptges,ccr9a,gpr183a,ptk2ba,cftr,lpxn,plxnc1,ccr12a,mmp14b,sdc4,rhof,cxcr3.2,ccr12b.1,ccl19a.1,cxcl18b,selp,itgb7,cxcl8a,cxcl8b.3,ccl34a.3,cxcl19,adam8b,rhov,ccl34a.4,cd40,ccl34b.8,ccl34b.9,itgb6…
4_Member	GO Biological Processes	GO:0006935	chemotaxis	-5.61351	-3.33622	39/403	30685,30767,140747,325599,334724,336933,373105,387293,393551,402857,405770,406272,406471,415151,493181,494109,553366,555805,556770,557258,559080,562273,563803,791200,791973,792585,794891,795785,100002627,100002946,100003859,100003896,100003911,100170820,100331911,100331978,100333601,100536594,100537869	aanat2,stat3,cxcr4a,lgals3b,anxa1a,rhogb,rab13,mmp13a,cyba,s1pr4,il1b,sema6d,tnfrsf1a,rac2,fgf7,ch25h,ccr9a,vaspa,gpr183a,ptk2ba,cftr,plxnc1,ccr12a,lrrc15,cxcr3.2,ccr12b.1,ccl19a.1,cxcl18b,ptafr,cxcl8a,cxcl8b.3,ccl34a.3,cxcl19,ccl34a.4,ccl34b.8,ccl34b.9,mmp25b,cxcl8b.1,ccl39.7
4_Member	GO Biological Processes	GO:0070555	response to interleukin-1	-5.35354	-3.11703	10/39	334724,405770,567444,794891,100003896,100170820,100270764,100331911,100331978,100537869	anxa1a,il1b,irak3,ccl19a.1,ccl34a.3,ccl34a.4,cd40,ccl34b.8,ccl34b.9,ccl39.7
4_Member	GO Biological Processes	GO:0042330	taxis	-5.1836	-2.96289	39/420	30685,30767,140747,325599,334724,336933,373105,387293,393551,402857,405770,406272,406471,415151,493181,494109,553366,555805,556770,557258,559080,562273,563803,791200,791973,792585,794891,795785,100002627,100002946,100003859,100003896,100003911,100170820,100331911,100331978,100333601,100536594,100537869	aanat2,stat3,cxcr4a,lgals3b,anxa1a,rhogb,rab13,mmp13a,cyba,s1pr4,il1b,sema6d,tnfrsf1a,rac2,fgf7,ch25h,ccr9a,vaspa,gpr183a,ptk2ba,cftr,plxnc1,ccr12a,lrrc15,cxcr3.2,ccr12b.1,ccl19a.1,cxcl18b,ptafr,cxcl8a,cxcl8b.3,ccl34a.3,cxcl19,ccl34a.4,ccl34b.8,ccl34b.9,mmp25b,cxcl8b.1,ccl39.7
4_Member	GO Biological Processes	GO:0070098	chemokine-mediated signaling pathway	-5.1413	-2.92827	10/41	791973,794891,795785,100003859,100003896,100003911,100170820,100331911,100331978,100537869	cxcr3.2,ccl19a.1,cxcl18b,cxcl8b.3,ccl34a.3,cxcl19,ccl34a.4,ccl34b.8,ccl34b.9,ccl39.7
4_Member	GO Biological Processes	GO:0034341	response to interferon-gamma	-4.99621	-2.80546	9/34	445073,794891,100003896,100007521,100170820,100270764,100331911,100331978,100537869	socs1a,ccl19a.1,ccl34a.3,socs1b,ccl34a.4,cd40,ccl34b.8,ccl34b.9,ccl39.7
4_Member	GO Biological Processes	GO:0072676	lymphocyte migration	-4.94234	-2.78635	10/43	394108,445073,494109,556770,794891,100003896,100170820,100331911,100331978,100537869	stk10,socs1a,ch25h,gpr183a,ccl19a.1,ccl34a.3,ccl34a.4,ccl34b.8,ccl34b.9,ccl39.7
4_Member	GO Biological Processes	GO:1990868	response to chemokine	-4.94234	-2.78635	10/43	791973,794891,795785,100003859,100003896,100003911,100170820,100331911,100331978,100537869	cxcr3.2,ccl19a.1,cxcl18b,cxcl8b.3,ccl34a.3,cxcl19,ccl34a.4,ccl34b.8,ccl34b.9,ccl39.7
4_Member	GO Biological Processes	GO:1990869	cellular response to chemokine	-4.94234	-2.78635	10/43	791973,794891,795785,100003859,100003896,100003911,100170820,100331911,100331978,100537869	cxcr3.2,ccl19a.1,cxcl18b,cxcl8b.3,ccl34a.3,cxcl19,ccl34a.4,ccl34b.8,ccl34b.9,ccl39.7
4_Member	GO Biological Processes	GO:0071347	cellular response to interleukin-1	-4.88402	-2.74119	9/35	405770,567444,794891,100003896,100170820,100270764,100331911,100331978,100537869	il1b,irak3,ccl19a.1,ccl34a.3,ccl34a.4,cd40,ccl34b.8,ccl34b.9,ccl39.7
4_Member	GO Biological Processes	GO:0048247	lymphocyte chemotaxis	-4.52543	-2.43734	8/30	494109,556770,794891,100003896,100170820,100331911,100331978,100537869	ch25h,gpr183a,ccl19a.1,ccl34a.3,ccl34a.4,ccl34b.8,ccl34b.9,ccl39.7
4_Member	GO Biological Processes	GO:0071346	cellular response to interferon-gamma	-4.20034	-2.20295	8/33	445073,794891,100003896,100007521,100170820,100331911,100331978,100537869	socs1a,ccl19a.1,ccl34a.3,socs1b,ccl34a.4,ccl34b.8,ccl34b.9,ccl39.7
4_Member	GO Biological Processes	GO:0002548	monocyte chemotaxis	-3.62725	-1.81972	7/30	325599,794891,100003896,100170820,100331911,100331978,100537869	lgals3b,ccl19a.1,ccl34a.3,ccl34a.4,ccl34b.8,ccl34b.9,ccl39.7
4_Member	GO Biological Processes	GO:0071674	mononuclear cell migration	-3.44165	-1.7032	7/32	325599,794891,100003896,100170820,100331911,100331978,100537869	lgals3b,ccl19a.1,ccl34a.3,ccl34a.4,ccl34b.8,ccl34b.9,ccl39.7
4_Member	GO Biological Processes	GO:0034612	response to tumor necrosis factor	-2.78134	-1.19451	8/52	393387,794891,100003896,100170820,100270764,100331911,100331978,100537869	ggt1a,ccl19a.1,ccl34a.3,ccl34a.4,cd40,ccl34b.8,ccl34b.9,ccl39.7
4_Member	GO Biological Processes	GO:0071356	cellular response to tumor necrosis factor	-2.52366	-0.981095	7/45	794891,100003896,100170820,100270764,100331911,100331978,100537869	ccl19a.1,ccl34a.3,ccl34a.4,cd40,ccl34b.8,ccl34b.9,ccl39.7
5_Summary	GO Biological Processes	GO:0033993	response to lipid	-11.0263	-8.23351	30/160	30464,246227,321837,334724,386661,393387,393608,402837,405770,406473,406658,445410,541514,553957,556440,559080,565295,565656,570410,794053,795785,100002946,100003859,100003911,100005416,100033581,100033582,100126017,100536137,100536356,30280,327284,335474,337315,337591,337597,378986,497629,541344,556770,561001,561370,767678,791973,792085,100148867,100188894,100270764,100320305,100536594,100885851…	rxrga,ptgs2a,keap1a,anxa1a,scd,ggt1a,ptger2a,hamp,il1b,pck2,cnn2,il12a,hhla2a.1,il10,si:dkey-15j16.3,cftr,cers2b,bcl3,ptger2b,il13,cxcl18b,cxcl8a,cxcl8b.3,cxcl19,ptger4b,mir21-1,mir21-2,gpr84,si:ch211-241b2.5,si:dkey-15j16.6,jak1,lgals9l3,arpc1b,fgb,fam49ba,lgals9l1,fga,kitb,prdx1,gpr183a,cd83,jak3,cish,cxcr3.2,ndrg1a,lrrc32,il4,cd40,im:7154036,cxcl8b.1,il6,stat3,stat6,rab13,cyp7a1,si:ch73-21k16.…
5_Member	GO Biological Processes	GO:0033993	response to lipid	-11.0263	-8.23351	30/160	30464,246227,321837,334724,386661,393387,393608,402837,405770,406473,406658,445410,541514,553957,556440,559080,565295,565656,570410,794053,795785,100002946,100003859,100003911,100005416,100033581,100033582,100126017,100536137,100536356	rxrga,ptgs2a,keap1a,anxa1a,scd,ggt1a,ptger2a,hamp,il1b,pck2,cnn2,il12a,hhla2a.1,il10,si:dkey-15j16.3,cftr,cers2b,bcl3,ptger2b,il13,cxcl18b,cxcl8a,cxcl8b.3,cxcl19,ptger4b,mir21-1,mir21-2,gpr84,si:ch211-241b2.5,si:dkey-15j16.6
5_Member	GO Biological Processes	GO:0071396	cellular response to lipid	-9.53641	-6.90993	19/75	321837,334724,393608,402837,405770,406473,541514,556440,559080,565295,570410,794053,795785,100002946,100003859,100003911,100005416,100536137,100536356	keap1a,anxa1a,ptger2a,hamp,il1b,pck2,hhla2a.1,si:dkey-15j16.3,cftr,cers2b,ptger2b,il13,cxcl18b,cxcl8a,cxcl8b.3,cxcl19,ptger4b,si:ch211-241b2.5,si:dkey-15j16.6
5_Member	GO Biological Processes	GO:0001775	cell activation	-7.43466	-4.94288	29/211	30280,327284,334724,335474,337315,337591,337597,378986,405770,497629,541344,541514,556440,556770,561001,561370,767678,791973,792085,100002946,100003859,100148867,100188894,100270764,100320305,100536137,100536356,100536594,100885851	jak1,lgals9l3,anxa1a,arpc1b,fgb,fam49ba,lgals9l1,fga,il1b,kitb,prdx1,hhla2a.1,si:dkey-15j16.3,gpr183a,cd83,jak3,cish,cxcr3.2,ndrg1a,cxcl8a,cxcl8b.3,lrrc32,il4,cd40,im:7154036,si:ch211-241b2.5,si:dkey-15j16.6,cxcl8b.1,il6
5_Member	GO Biological Processes	GO:1901701	cellular response to oxygen-containing compound	-7.18754	-4.72378	28/204	30767,321837,334724,337413,373105,393608,394148,402837,405770,406473,541344,541514,556440,559080,560638,569142,570410,793937,794053,795785,100002946,100003859,100003911,100005416,100149048,100149745,100536137,100536356	stat3,keap1a,anxa1a,stat6,rab13,ptger2a,cyp7a1,hamp,il1b,pck2,prdx1,hhla2a.1,si:dkey-15j16.3,cftr,si:ch73-21k16.1,entpd2b,ptger2b,agtrap,il13,cxcl18b,cxcl8a,cxcl8b.3,cxcl19,ptger4b,si:zfos-80g12.1,sesn2,si:ch211-241b2.5,si:dkey-15j16.6
5_Member	GO Biological Processes	GO:1901700	response to oxygen-containing compound	-7.08425	-4.65941	37/325	30464,30767,321837,334724,337413,373105,386661,393387,393608,394148,402837,405770,406473,445073,445410,541344,541514,553957,556440,559080,560638,569142,570410,793937,794053,795785,100002946,100003859,100003911,100005416,100033581,100033582,100126017,100149048,100149745,100536137,100536356	rxrga,stat3,keap1a,anxa1a,stat6,rab13,scd,ggt1a,ptger2a,cyp7a1,hamp,il1b,pck2,socs1a,il12a,prdx1,hhla2a.1,il10,si:dkey-15j16.3,cftr,si:ch73-21k16.1,entpd2b,ptger2b,agtrap,il13,cxcl18b,cxcl8a,cxcl8b.3,cxcl19,ptger4b,mir21-1,mir21-2,gpr84,si:zfos-80g12.1,sesn2,si:ch211-241b2.5,si:dkey-15j16.6
5_Member	GO Biological Processes	GO:0032496	response to lipopolysaccharide	-6.97765	-4.56505	13/49	393387,405770,445410,541514,553957,556440,794053,795785,100003859,100003911,100126017,100536137,100536356	ggt1a,il1b,il12a,hhla2a.1,il10,si:dkey-15j16.3,il13,cxcl18b,cxcl8b.3,cxcl19,gpr84,si:ch211-241b2.5,si:dkey-15j16.6
5_Member	GO Biological Processes	GO:0002237	response to molecule of bacterial origin	-6.54159	-4.16375	13/53	393387,405770,445410,541514,553957,556440,794053,795785,100003859,100003911,100126017,100536137,100536356	ggt1a,il1b,il12a,hhla2a.1,il10,si:dkey-15j16.3,il13,cxcl18b,cxcl8b.3,cxcl19,gpr84,si:ch211-241b2.5,si:dkey-15j16.6
5_Member	GO Biological Processes	GO:0045321	leukocyte activation	-6.26616	-3.91004	25/187	30280,327284,334724,335474,337591,337597,405770,497629,541344,541514,556440,556770,561001,561370,767678,791973,792085,100002946,100003859,100188894,100270764,100536137,100536356,100536594,100885851	jak1,lgals9l3,anxa1a,arpc1b,fam49ba,lgals9l1,il1b,kitb,prdx1,hhla2a.1,si:dkey-15j16.3,gpr183a,cd83,jak3,cish,cxcr3.2,ndrg1a,cxcl8a,cxcl8b.3,il4,cd40,si:ch211-241b2.5,si:dkey-15j16.6,cxcl8b.1,il6
5_Member	GO Biological Processes	GO:0071219	cellular response to molecule of bacterial origin	-5.92658	-3.60113	9/27	405770,541514,556440,794053,795785,100003859,100003911,100536137,100536356	il1b,hhla2a.1,si:dkey-15j16.3,il13,cxcl18b,cxcl8b.3,cxcl19,si:ch211-241b2.5,si:dkey-15j16.6
5_Member	GO Biological Processes	GO:0071222	cellular response to lipopolysaccharide	-5.92658	-3.60113	9/27	405770,541514,556440,794053,795785,100003859,100003911,100536137,100536356	il1b,hhla2a.1,si:dkey-15j16.3,il13,cxcl18b,cxcl8b.3,cxcl19,si:ch211-241b2.5,si:dkey-15j16.6
5_Member	GO Biological Processes	GO:0071216	cellular response to biotic stimulus	-5.63071	-3.34145	9/29	405770,541514,556440,794053,795785,100003859,100003911,100536137,100536356	il1b,hhla2a.1,si:dkey-15j16.3,il13,cxcl18b,cxcl8b.3,cxcl19,si:ch211-241b2.5,si:dkey-15j16.6
5_Member	GO Biological Processes	GO:0007159	leukocyte cell-cell adhesion	-4.94234	-2.78635	10/43	327284,334724,337591,337597,541514,556440,100320305,100536137,100536356,100884146	lgals9l3,anxa1a,fam49ba,lgals9l1,hhla2a.1,si:dkey-15j16.3,im:7154036,si:ch211-241b2.5,si:dkey-15j16.6,selplg
5_Member	GO Biological Processes	GO:0022407	regulation of cell-cell adhesion	-4.80129	-2.67124	14/85	327284,334724,337591,337597,368917,541514,556440,556770,571368,100002946,100005593,100320305,100536137,100536356	lgals9l3,anxa1a,fam49ba,lgals9l1,adam8a,hhla2a.1,si:dkey-15j16.3,gpr183a,ifngr1,cxcl8a,adam8b,im:7154036,si:ch211-241b2.5,si:dkey-15j16.6
5_Member	GO Biological Processes	GO:0030155	regulation of cell adhesion	-4.6708	-2.56522	18/135	327284,334724,337591,337597,368917,541514,556440,556770,557258,562273,571217,571368,100002946,100005593,100008445,100320305,100536137,100536356	lgals9l3,anxa1a,fam49ba,lgals9l1,adam8a,hhla2a.1,si:dkey-15j16.3,gpr183a,ptk2ba,plxnc1,tnfrsf18,ifngr1,cxcl8a,adam8b,plaua,im:7154036,si:ch211-241b2.5,si:dkey-15j16.6
5_Member	GO Biological Processes	GO:0002683	negative regulation of immune system process	-4.37651	-2.33702	12/70	30117,327284,334724,337597,406463,445073,541514,556440,567444,767678,100536137,100536356	spi1b,lgals9l3,anxa1a,lgals9l1,nfkbiaa,socs1a,hhla2a.1,si:dkey-15j16.3,irak3,cish,si:ch211-241b2.5,si:dkey-15j16.6
5_Member	GO Biological Processes	GO:0042110	T cell activation	-4.1428	-2.16088	14/97	30280,327284,334724,335474,337591,337597,541514,556440,556770,561001,561370,100536137,100536356,100885851	jak1,lgals9l3,anxa1a,arpc1b,fam49ba,lgals9l1,hhla2a.1,si:dkey-15j16.3,gpr183a,cd83,jak3,si:ch211-241b2.5,si:dkey-15j16.6,il6
5_Member	GO Biological Processes	GO:0032943	mononuclear cell proliferation	-4.11659	-2.16088	9/43	327284,334724,337597,541514,556440,100188894,100270764,100536137,100536356	lgals9l3,anxa1a,lgals9l1,hhla2a.1,si:dkey-15j16.3,il4,cd40,si:ch211-241b2.5,si:dkey-15j16.6
5_Member	GO Biological Processes	GO:0046651	lymphocyte proliferation	-4.11659	-2.16088	9/43	327284,334724,337597,541514,556440,100188894,100270764,100536137,100536356	lgals9l3,anxa1a,lgals9l1,hhla2a.1,si:dkey-15j16.3,il4,cd40,si:ch211-241b2.5,si:dkey-15j16.6
5_Member	GO Biological Processes	GO:0070661	leukocyte proliferation	-4.11659	-2.16088	9/43	327284,334724,337597,541514,556440,100188894,100270764,100536137,100536356	lgals9l3,anxa1a,lgals9l1,hhla2a.1,si:dkey-15j16.3,il4,cd40,si:ch211-241b2.5,si:dkey-15j16.6
5_Member	GO Biological Processes	GO:0002695	negative regulation of leukocyte activation	-4.1005	-2.16088	8/34	327284,334724,337597,541514,556440,767678,100536137,100536356	lgals9l3,anxa1a,lgals9l1,hhla2a.1,si:dkey-15j16.3,cish,si:ch211-241b2.5,si:dkey-15j16.6
5_Member	GO Biological Processes	GO:0050866	negative regulation of cell activation	-4.1005	-2.16088	8/34	327284,334724,337597,541514,556440,767678,100536137,100536356	lgals9l3,anxa1a,lgals9l1,hhla2a.1,si:dkey-15j16.3,cish,si:ch211-241b2.5,si:dkey-15j16.6
5_Member	GO Biological Processes	GO:0051250	negative regulation of lymphocyte activation	-4.1005	-2.16088	8/34	327284,334724,337597,541514,556440,767678,100536137,100536356	lgals9l3,anxa1a,lgals9l1,hhla2a.1,si:dkey-15j16.3,cish,si:ch211-241b2.5,si:dkey-15j16.6
5_Member	GO Biological Processes	GO:0008285	negative regulation of cell proliferation	-3.99393	-2.08949	13/88	317638,327284,327292,337597,492479,541514,556440,568416,792160,100330352,100536137,100536356,100538016	igfbp1a,lgals9l3,tpte,lgals9l1,btg3,hhla2a.1,si:dkey-15j16.3,wt1b,irf1b,si:ch73-361p23.3,si:ch211-241b2.5,si:dkey-15j16.6,si:dkey-79d12.5
5_Member	GO Biological Processes	GO:0022408	negative regulation of cell-cell adhesion	-3.96295	-2.06572	10/55	327284,334724,337597,541514,556440,556770,571368,100002946,100536137,100536356	lgals9l3,anxa1a,lgals9l1,hhla2a.1,si:dkey-15j16.3,gpr183a,ifngr1,cxcl8a,si:ch211-241b2.5,si:dkey-15j16.6
5_Member	GO Biological Processes	GO:0032946	positive regulation of mononuclear cell proliferation	-3.82808	-1.98586	6/20	334724,541514,556440,100270764,100536137,100536356	anxa1a,hhla2a.1,si:dkey-15j16.3,cd40,si:ch211-241b2.5,si:dkey-15j16.6
5_Member	GO Biological Processes	GO:0042130	negative regulation of T cell proliferation	-3.82808	-1.98586	6/20	327284,337597,541514,556440,100536137,100536356	lgals9l3,lgals9l1,hhla2a.1,si:dkey-15j16.3,si:ch211-241b2.5,si:dkey-15j16.6
5_Member	GO Biological Processes	GO:0050671	positive regulation of lymphocyte proliferation	-3.82808	-1.98586	6/20	334724,541514,556440,100270764,100536137,100536356	anxa1a,hhla2a.1,si:dkey-15j16.3,cd40,si:ch211-241b2.5,si:dkey-15j16.6
5_Member	GO Biological Processes	GO:0070665	positive regulation of leukocyte proliferation	-3.82808	-1.98586	6/20	334724,541514,556440,100270764,100536137,100536356	anxa1a,hhla2a.1,si:dkey-15j16.3,cd40,si:ch211-241b2.5,si:dkey-15j16.6
5_Member	GO Biological Processes	GO:0007162	negative regulation of cell adhesion	-3.82414	-1.98558	11/68	327284,334724,337597,541514,556440,556770,562273,571368,100002946,100536137,100536356	lgals9l3,anxa1a,lgals9l1,hhla2a.1,si:dkey-15j16.3,gpr183a,plxnc1,ifngr1,cxcl8a,si:ch211-241b2.5,si:dkey-15j16.6
5_Member	GO Biological Processes	GO:0046649	lymphocyte activation	-3.69765	-1.87796	18/160	30280,327284,334724,335474,337591,337597,497629,541514,556440,556770,561001,561370,767678,100188894,100270764,100536137,100536356,100885851	jak1,lgals9l3,anxa1a,arpc1b,fam49ba,lgals9l1,kitb,hhla2a.1,si:dkey-15j16.3,gpr183a,cd83,jak3,cish,il4,cd40,si:ch211-241b2.5,si:dkey-15j16.6,il6
5_Member	GO Biological Processes	GO:0032945	negative regulation of mononuclear cell proliferation	-3.57587	-1.80036	6/22	327284,337597,541514,556440,100536137,100536356	lgals9l3,lgals9l1,hhla2a.1,si:dkey-15j16.3,si:ch211-241b2.5,si:dkey-15j16.6
5_Member	GO Biological Processes	GO:0050672	negative regulation of lymphocyte proliferation	-3.57587	-1.80036	6/22	327284,337597,541514,556440,100536137,100536356	lgals9l3,lgals9l1,hhla2a.1,si:dkey-15j16.3,si:ch211-241b2.5,si:dkey-15j16.6
5_Member	GO Biological Processes	GO:0050870	positive regulation of T cell activation	-3.57587	-1.80036	6/22	334724,337591,541514,556440,100536137,100536356	anxa1a,fam49ba,hhla2a.1,si:dkey-15j16.3,si:ch211-241b2.5,si:dkey-15j16.6
5_Member	GO Biological Processes	GO:0070664	negative regulation of leukocyte proliferation	-3.57587	-1.80036	6/22	327284,337597,541514,556440,100536137,100536356	lgals9l3,lgals9l1,hhla2a.1,si:dkey-15j16.3,si:ch211-241b2.5,si:dkey-15j16.6
5_Member	GO Biological Processes	GO:1903039	positive regulation of leukocyte cell-cell adhesion	-3.57587	-1.80036	6/22	334724,337591,541514,556440,100536137,100536356	anxa1a,fam49ba,hhla2a.1,si:dkey-15j16.3,si:ch211-241b2.5,si:dkey-15j16.6
5_Member	GO Biological Processes	GO:0032944	regulation of mononuclear cell proliferation	-3.57337	-1.80036	8/40	327284,334724,337597,541514,556440,100270764,100536137,100536356	lgals9l3,anxa1a,lgals9l1,hhla2a.1,si:dkey-15j16.3,cd40,si:ch211-241b2.5,si:dkey-15j16.6
5_Member	GO Biological Processes	GO:0050670	regulation of lymphocyte proliferation	-3.57337	-1.80036	8/40	327284,334724,337597,541514,556440,100270764,100536137,100536356	lgals9l3,anxa1a,lgals9l1,hhla2a.1,si:dkey-15j16.3,cd40,si:ch211-241b2.5,si:dkey-15j16.6
5_Member	GO Biological Processes	GO:0070663	regulation of leukocyte proliferation	-3.57337	-1.80036	8/40	327284,334724,337597,541514,556440,100270764,100536137,100536356	lgals9l3,anxa1a,lgals9l1,hhla2a.1,si:dkey-15j16.3,cd40,si:ch211-241b2.5,si:dkey-15j16.6
5_Member	GO Biological Processes	GO:1903037	regulation of leukocyte cell-cell adhesion	-3.57337	-1.80036	8/40	327284,334724,337591,337597,541514,556440,100536137,100536356	lgals9l3,anxa1a,fam49ba,lgals9l1,hhla2a.1,si:dkey-15j16.3,si:ch211-241b2.5,si:dkey-15j16.6
5_Member	GO Biological Processes	GO:0050868	negative regulation of T cell activation	-3.53249	-1.76852	7/31	327284,334724,337597,541514,556440,100536137,100536356	lgals9l3,anxa1a,lgals9l1,hhla2a.1,si:dkey-15j16.3,si:ch211-241b2.5,si:dkey-15j16.6
5_Member	GO Biological Processes	GO:1903038	negative regulation of leukocyte cell-cell adhesion	-3.53249	-1.76852	7/31	327284,334724,337597,541514,556440,100536137,100536356	lgals9l3,anxa1a,lgals9l1,hhla2a.1,si:dkey-15j16.3,si:ch211-241b2.5,si:dkey-15j16.6
5_Member	GO Biological Processes	GO:0031294	lymphocyte costimulation	-3.43308	-1.70223	4/9	541514,556440,100536137,100536356	hhla2a.1,si:dkey-15j16.3,si:ch211-241b2.5,si:dkey-15j16.6
5_Member	GO Biological Processes	GO:0031295	T cell costimulation	-3.43308	-1.70223	4/9	541514,556440,100536137,100536356	hhla2a.1,si:dkey-15j16.3,si:ch211-241b2.5,si:dkey-15j16.6
5_Member	GO Biological Processes	GO:0022409	positive regulation of cell-cell adhesion	-3.2487	-1.55163	6/25	334724,337591,541514,556440,100536137,100536356	anxa1a,fam49ba,hhla2a.1,si:dkey-15j16.3,si:ch211-241b2.5,si:dkey-15j16.6
5_Member	GO Biological Processes	GO:0042129	regulation of T cell proliferation	-3.11256	-1.44901	7/36	327284,334724,337597,541514,556440,100536137,100536356	lgals9l3,anxa1a,lgals9l1,hhla2a.1,si:dkey-15j16.3,si:ch211-241b2.5,si:dkey-15j16.6
5_Member	GO Biological Processes	GO:0042102	positive regulation of T cell proliferation	-3.09518	-1.44014	5/18	334724,541514,556440,100536137,100536356	anxa1a,hhla2a.1,si:dkey-15j16.3,si:ch211-241b2.5,si:dkey-15j16.6
5_Member	GO Biological Processes	GO:0042098	T cell proliferation	-2.96568	-1.32921	7/38	327284,334724,337597,541514,556440,100536137,100536356	lgals9l3,anxa1a,lgals9l1,hhla2a.1,si:dkey-15j16.3,si:ch211-241b2.5,si:dkey-15j16.6
5_Member	GO Biological Processes	GO:0045785	positive regulation of cell adhesion	-2.89605	-1.26934	7/39	334724,337591,541514,556440,571217,100536137,100536356	anxa1a,fam49ba,hhla2a.1,si:dkey-15j16.3,tnfrsf18,si:ch211-241b2.5,si:dkey-15j16.6
5_Member	GO Biological Processes	GO:0050863	regulation of T cell activation	-2.78134	-1.19451	8/52	327284,334724,337591,337597,541514,556440,100536137,100536356	lgals9l3,anxa1a,fam49ba,lgals9l1,hhla2a.1,si:dkey-15j16.3,si:ch211-241b2.5,si:dkey-15j16.6
5_Member	GO Biological Processes	GO:0051249	regulation of lymphocyte activation	-2.06591	-0.625921	10/96	327284,334724,337591,337597,541514,556440,767678,100270764,100536137,100536356	lgals9l3,anxa1a,fam49ba,lgals9l1,hhla2a.1,si:dkey-15j16.3,cish,cd40,si:ch211-241b2.5,si:dkey-15j16.6
6_Summary	GO Biological Processes	GO:0008283	cell proliferation	-9.69095	-7.02308	50/430	30767,280650,317638,321283,321897,325410,327284,327292,334724,335916,336038,337413,337597,338304,359834,403032,407086,407664,492479,493181,494071,541514,553181,555232,556440,556894,557258,560193,560341,563884,568159,568416,570404,678622,792085,792160,797938,100002272,100005014,100188894,100270759,100270764,100330352,100334610,100536023,100536137,100536356,100538016,101885596,108180095	stat3,klf6a,igfbp1a,tacc3,gnl3,irf2a,lgals9l3,tpte,anxa1a,jun,junbb,stat6,lgals9l1,ppdpfa,tgfb1a,tes,junba,hbegfb,btg3,fgf7,irf2,hhla2a.1,kitlgb,ptk6a,si:dkey-15j16.3,tfec,ptk2ba,il34,mych,tgfb1b,ago3b,wt1b,il11a,tnfrsf9a,ndrg1a,irf1b,hbegfa,dusp22b,mob1a,il4,csf3a,cd40,si:ch73-361p23.3,nppb,apela,si:ch211-241b2.5,si:dkey-15j16.6,si:dkey-79d12.5,hck,il11b
6_Member	GO Biological Processes	GO:0008283	cell proliferation	-9.69095	-7.02308	50/430	30767,280650,317638,321283,321897,325410,327284,327292,334724,335916,336038,337413,337597,338304,359834,403032,407086,407664,492479,493181,494071,541514,553181,555232,556440,556894,557258,560193,560341,563884,568159,568416,570404,678622,792085,792160,797938,100002272,100005014,100188894,100270759,100270764,100330352,100334610,100536023,100536137,100536356,100538016,101885596,108180095	stat3,klf6a,igfbp1a,tacc3,gnl3,irf2a,lgals9l3,tpte,anxa1a,jun,junbb,stat6,lgals9l1,ppdpfa,tgfb1a,tes,junba,hbegfb,btg3,fgf7,irf2,hhla2a.1,kitlgb,ptk6a,si:dkey-15j16.3,tfec,ptk2ba,il34,mych,tgfb1b,ago3b,wt1b,il11a,tnfrsf9a,ndrg1a,irf1b,hbegfa,dusp22b,mob1a,il4,csf3a,cd40,si:ch73-361p23.3,nppb,apela,si:ch211-241b2.5,si:dkey-15j16.6,si:dkey-79d12.5,hck,il11b
6_Member	GO Biological Processes	GO:0042127	regulation of cell proliferation	-9.05881	-6.48784	41/326	30767,280650,317638,321897,327284,327292,334724,335916,336038,337413,337597,359834,403032,407086,407664,492479,493181,541514,553181,555232,556440,557258,560193,560341,563884,568159,568416,570404,678622,792085,792160,797938,100002272,100270764,100330352,100536023,100536137,100536356,100538016,101885596,108180095	stat3,klf6a,igfbp1a,gnl3,lgals9l3,tpte,anxa1a,jun,junbb,stat6,lgals9l1,tgfb1a,tes,junba,hbegfb,btg3,fgf7,hhla2a.1,kitlgb,ptk6a,si:dkey-15j16.3,ptk2ba,il34,mych,tgfb1b,ago3b,wt1b,il11a,tnfrsf9a,ndrg1a,irf1b,hbegfa,dusp22b,cd40,si:ch73-361p23.3,apela,si:ch211-241b2.5,si:dkey-15j16.6,si:dkey-79d12.5,hck,il11b
6_Member	GO Biological Processes	GO:0008284	positive regulation of cell proliferation	-3.76176	-1.92957	16/131	30767,334724,407664,493181,541514,553181,556440,560193,560341,570404,797938,100270764,100536023,100536137,100536356,108180095	stat3,anxa1a,hbegfb,fgf7,hhla2a.1,kitlgb,si:dkey-15j16.3,il34,mych,il11a,hbegfa,cd40,apela,si:ch211-241b2.5,si:dkey-15j16.6,il11b
7_Summary	GO Biological Processes	GO:0002520	immune system development	-7.7041	-5.16656	52/522	30104,30117,30216,30280,30481,30590,30744,58054,64607,65238,84703,266985,280650,321449,334724,335474,359834,394198,406463,436895,445073,445318,445394,494477,497629,553181,555766,556770,556894,559080,559295,560193,560210,560339,561370,563884,566473,566604,567444,571368,613144,641560,751704,767678,796481,100001537,100002946,100037357,100270759,100270764,100884146,100885851,415151,567949,768248	klf1,spi1b,hbba1,jak1,gata1a,tp53,cbfb,pim2,alas2,klf17,slc4a1a,npm1a,klf6a,ccn2a,anxa1a,arpc1b,tgfb1a,fosab,nfkbiaa,irf8,socs1a,nrros,wdr55,tfr1a,kitb,kitlgb,etsrp,gpr183a,tfec,cftr,ada2b,il34,hsp70l,tfpi2,jak3,tgfb1b,emilin1a,casp3b,irak3,ifngr1,dkc1,slc7a7,spi1a,cish,selp,dok2,cxcl8a,tnfrsf1b,csf3a,cd40,selplg,il6,rac2,piezo1,fas
7_Member	GO Biological Processes	GO:0002520	immune system development	-7.7041	-5.16656	52/522	30104,30117,30216,30280,30481,30590,30744,58054,64607,65238,84703,266985,280650,321449,334724,335474,359834,394198,406463,436895,445073,445318,445394,494477,497629,553181,555766,556770,556894,559080,559295,560193,560210,560339,561370,563884,566473,566604,567444,571368,613144,641560,751704,767678,796481,100001537,100002946,100037357,100270759,100270764,100884146,100885851	klf1,spi1b,hbba1,jak1,gata1a,tp53,cbfb,pim2,alas2,klf17,slc4a1a,npm1a,klf6a,ccn2a,anxa1a,arpc1b,tgfb1a,fosab,nfkbiaa,irf8,socs1a,nrros,wdr55,tfr1a,kitb,kitlgb,etsrp,gpr183a,tfec,cftr,ada2b,il34,hsp70l,tfpi2,jak3,tgfb1b,emilin1a,casp3b,irak3,ifngr1,dkc1,slc7a7,spi1a,cish,selp,dok2,cxcl8a,tnfrsf1b,csf3a,cd40,selplg,il6
7_Member	GO Biological Processes	GO:0048534	hematopoietic or lymphoid organ development	-7.59301	-5.07127	51/511	30104,30117,30216,30280,30481,30590,30744,58054,64607,65238,84703,266985,280650,321449,334724,335474,359834,394198,406463,436895,445073,445318,445394,494477,497629,553181,555766,556770,556894,559080,559295,560193,560210,560339,561370,563884,566473,566604,567444,571368,613144,641560,751704,767678,796481,100001537,100002946,100037357,100270759,100884146,100885851	klf1,spi1b,hbba1,jak1,gata1a,tp53,cbfb,pim2,alas2,klf17,slc4a1a,npm1a,klf6a,ccn2a,anxa1a,arpc1b,tgfb1a,fosab,nfkbiaa,irf8,socs1a,nrros,wdr55,tfr1a,kitb,kitlgb,etsrp,gpr183a,tfec,cftr,ada2b,il34,hsp70l,tfpi2,jak3,tgfb1b,emilin1a,casp3b,irak3,ifngr1,dkc1,slc7a7,spi1a,cish,selp,dok2,cxcl8a,tnfrsf1b,csf3a,selplg,il6
7_Member	GO Biological Processes	GO:0030097	hemopoiesis	-7.53792	-5.03142	50/498	30104,30117,30216,30280,30481,30590,30744,58054,64607,65238,84703,266985,280650,321449,334724,335474,359834,394198,406463,436895,445073,445318,494477,497629,553181,555766,556770,556894,559080,559295,560193,560210,560339,561370,563884,566473,566604,567444,571368,613144,641560,751704,767678,796481,100001537,100002946,100037357,100270759,100884146,100885851	klf1,spi1b,hbba1,jak1,gata1a,tp53,cbfb,pim2,alas2,klf17,slc4a1a,npm1a,klf6a,ccn2a,anxa1a,arpc1b,tgfb1a,fosab,nfkbiaa,irf8,socs1a,nrros,tfr1a,kitb,kitlgb,etsrp,gpr183a,tfec,cftr,ada2b,il34,hsp70l,tfpi2,jak3,tgfb1b,emilin1a,casp3b,irak3,ifngr1,dkc1,slc7a7,spi1a,cish,selp,dok2,cxcl8a,tnfrsf1b,csf3a,selplg,il6
7_Member	GO Biological Processes	GO:0048872	homeostasis of number of cells	-5.3949	-3.15028	20/144	30104,30117,30481,30590,64607,65238,84703,280650,334724,415151,494477,553181,556770,556894,561370,566604,567949,767678,768248,100001537	klf1,spi1b,gata1a,tp53,alas2,klf17,slc4a1a,klf6a,anxa1a,rac2,tfr1a,kitlgb,gpr183a,tfec,jak3,casp3b,piezo1,cish,fas,dok2
7_Member	GO Biological Processes	GO:0030099	myeloid cell differentiation	-4.50404	-2.42674	23/206	30104,30117,30481,30590,64607,65238,84703,280650,335474,436895,445318,494477,555766,556770,559295,560193,561370,566604,641560,751704,767678,100001537,100270759	klf1,spi1b,gata1a,tp53,alas2,klf17,slc4a1a,klf6a,arpc1b,irf8,nrros,tfr1a,etsrp,gpr183a,ada2b,il34,jak3,casp3b,slc7a7,spi1a,cish,dok2,csf3a
7_Member	GO Biological Processes	GO:0002262	myeloid cell homeostasis	-3.96218	-2.06572	16/126	30104,30117,30481,30590,64607,65238,84703,280650,334724,415151,494477,561370,566604,567949,767678,100001537	klf1,spi1b,gata1a,tp53,alas2,klf17,slc4a1a,klf6a,anxa1a,rac2,tfr1a,jak3,casp3b,piezo1,cish,dok2
7_Member	GO Biological Processes	GO:0035162	embryonic hemopoiesis	-3.69794	-1.87796	13/94	30104,30481,64607,84703,445073,494477,497629,553181,555766,559080,567444,100001537,100270759	klf1,gata1a,alas2,slc4a1a,socs1a,tfr1a,kitb,kitlgb,etsrp,cftr,irak3,dok2,csf3a
7_Member	GO Biological Processes	GO:0034101	erythrocyte homeostasis	-3.31092	-1.60447	14/116	30104,30117,30481,30590,64607,65238,84703,280650,494477,561370,566604,567949,767678,100001537	klf1,spi1b,gata1a,tp53,alas2,klf17,slc4a1a,klf6a,tfr1a,jak3,casp3b,piezo1,cish,dok2
7_Member	GO Biological Processes	GO:0030218	erythrocyte differentiation	-2.84864	-1.24494	13/115	30104,30117,30481,30590,64607,65238,84703,280650,494477,561370,566604,767678,100001537	klf1,spi1b,gata1a,tp53,alas2,klf17,slc4a1a,klf6a,tfr1a,jak3,casp3b,cish,dok2
8_Summary	GO Biological Processes	GO:0007259	JAK-STAT cascade	-6.54603	-4.16375	11/37	30767,335409,337413,406596,436923,445073,497629,562247,767678,100007521,100270764,393391,407664,493181,555232,557258,797938,101885596	stat3,socs3a,stat6,socs3b,crlf1a,socs1a,kitb,clcf1,cish,socs1b,cd40,tpst2,hbegfb,fgf7,ptk6a,ptk2ba,hbegfa,hck
8_Member	GO Biological Processes	GO:0007259	JAK-STAT cascade	-6.54603	-4.16375	11/37	30767,335409,337413,406596,436923,445073,497629,562247,767678,100007521,100270764	stat3,socs3a,stat6,socs3b,crlf1a,socs1a,kitb,clcf1,cish,socs1b,cd40
8_Member	GO Biological Processes	GO:0097696	STAT cascade	-6.54603	-4.16375	11/37	30767,335409,337413,406596,436923,445073,497629,562247,767678,100007521,100270764	stat3,socs3a,stat6,socs3b,crlf1a,socs1a,kitb,clcf1,cish,socs1b,cd40
8_Member	GO Biological Processes	GO:0046425	regulation of JAK-STAT cascade	-4.05224	-2.13376	7/26	436923,445073,497629,562247,767678,100007521,100270764	crlf1a,socs1a,kitb,clcf1,cish,socs1b,cd40
8_Member	GO Biological Processes	GO:1904892	regulation of STAT cascade	-4.05224	-2.13376	7/26	436923,445073,497629,562247,767678,100007521,100270764	crlf1a,socs1a,kitb,clcf1,cish,socs1b,cd40
8_Member	GO Biological Processes	GO:0046426	negative regulation of JAK-STAT cascade	-3.12089	-1.45084	3/5	445073,767678,100007521	socs1a,cish,socs1b
8_Member	GO Biological Processes	GO:1904893	negative regulation of STAT cascade	-3.12089	-1.45084	3/5	445073,767678,100007521	socs1a,cish,socs1b
8_Member	GO Biological Processes	GO:0018212	peptidyl-tyrosine modification	-2.96979	-1.32927	11/85	393391,407664,436923,445073,493181,555232,557258,562247,797938,100270764,101885596	tpst2,hbegfb,crlf1a,socs1a,fgf7,ptk6a,ptk2ba,clcf1,hbegfa,cd40,hck
8_Member	GO Biological Processes	GO:0007260	tyrosine phosphorylation of STAT protein	-2.88414	-1.26934	4/12	436923,445073,562247,100270764	crlf1a,socs1a,clcf1,cd40
8_Member	GO Biological Processes	GO:0042509	regulation of tyrosine phosphorylation of STAT protein	-2.88414	-1.26934	4/12	436923,445073,562247,100270764	crlf1a,socs1a,clcf1,cd40
8_Member	GO Biological Processes	GO:0018108	peptidyl-tyrosine phosphorylation	-2.55413	-1.00518	10/82	407664,436923,445073,493181,555232,557258,562247,797938,100270764,101885596	hbegfb,crlf1a,socs1a,fgf7,ptk6a,ptk2ba,clcf1,hbegfa,cd40,hck
8_Member	GO Biological Processes	GO:0050730	regulation of peptidyl-tyrosine phosphorylation	-2.41432	-0.894128	7/47	407664,436923,445073,493181,562247,797938,100270764	hbegfb,crlf1a,socs1a,fgf7,clcf1,hbegfa,cd40
8_Member	GO Biological Processes	GO:0050731	positive regulation of peptidyl-tyrosine phosphorylation	-2.38309	-0.870552	6/36	407664,436923,493181,562247,797938,100270764	hbegfb,crlf1a,fgf7,clcf1,hbegfa,cd40
9_Summary	GO Biological Processes	GO:0002252	immune effector process	-6.33817	-3.97132	24/173	321046,334724,393611,405825,406397,406471,415151,494109,556770,559080,561001,562475,570832,791973,792160,792472,794635,795096,100002946,100188894,100270764,100331428,100538070,100885851,30255,795785,100003859,100003911,100334940,337315,378986,561287	c3a.1,anxa1a,c6,mfap4,mmp9,tnfrsf1a,rac2,ch25h,gpr183a,cftr,cd83,c7a,c7b,cxcr3.2,irf1b,cfbl,c4b,ifit16,cxcl8a,il4,cd40,c3a.4,si:ch1073-110a20.2,il6,tfa,cxcl18b,cxcl8b.3,cxcl19,traf3ip2l,fgb,fga,f13a1b
9_Member	GO Biological Processes	GO:0002252	immune effector process	-6.33817	-3.97132	24/173	321046,334724,393611,405825,406397,406471,415151,494109,556770,559080,561001,562475,570832,791973,792160,792472,794635,795096,100002946,100188894,100270764,100331428,100538070,100885851	c3a.1,anxa1a,c6,mfap4,mmp9,tnfrsf1a,rac2,ch25h,gpr183a,cftr,cd83,c7a,c7b,cxcr3.2,irf1b,cfbl,c4b,ifit16,cxcl8a,il4,cd40,c3a.4,si:ch1073-110a20.2,il6
9_Member	GO Biological Processes	GO:0006959	humoral immune response	-4.80129	-2.67124	14/85	30255,321046,393611,405825,562475,570832,792472,794635,795785,100003859,100003911,100331428,100334940,100538070	tfa,c3a.1,c6,mfap4,c7a,c7b,cfbl,c4b,cxcl18b,cxcl8b.3,cxcl19,c3a.4,traf3ip2l,si:ch1073-110a20.2
9_Member	GO Biological Processes	GO:0072376	protein activation cascade	-4.13089	-2.16088	12/74	321046,337315,378986,393611,405825,561287,562475,570832,792472,794635,100331428,100538070	c3a.1,fgb,fga,c6,mfap4,f13a1b,c7a,c7b,cfbl,c4b,c3a.4,si:ch1073-110a20.2
9_Member	GO Biological Processes	GO:0006956	complement activation	-2.77959	-1.19451	9/64	321046,393611,405825,562475,570832,792472,794635,100331428,100538070	c3a.1,c6,mfap4,c7a,c7b,cfbl,c4b,c3a.4,si:ch1073-110a20.2
10_Summary	GO Biological Processes	GO:0009611	response to wounding	-6.11599	-3.77033	31/270	30767,334724,335409,336038,337315,378986,394125,394198,403033,405770,406397,406471,406625,406645,415151,560339,561287,562247,567257,568593,777651,794365,797938,799082,799377,100002946,100006778,100148867,100320305,100329613,100536594,317638,321449,373081,394066,503594,751668,100333407	stat3,anxa1a,socs3a,junbb,fgb,fga,rhoca,fosab,ccn1,il1b,mmp9,tnfrsf1a,lgmn,ctsba,rac2,tfpi2,f13a1b,clcf1,f3a,sdc4,il10ra,f2r2.2,hbegfa,si:dkey-163m14.2,dkk1a,cxcl8a,il6st,lrrc32,im:7154036,hcar1-4,cxcl8b.1,igfbp1a,ccn2a,mvp,lin28a,il4r.1,gck,adamts9
10_Member	GO Biological Processes	GO:0009611	response to wounding	-6.11599	-3.77033	31/270	30767,334724,335409,336038,337315,378986,394125,394198,403033,405770,406397,406471,406625,406645,415151,560339,561287,562247,567257,568593,777651,794365,797938,799082,799377,100002946,100006778,100148867,100320305,100329613,100536594	stat3,anxa1a,socs3a,junbb,fgb,fga,rhoca,fosab,ccn1,il1b,mmp9,tnfrsf1a,lgmn,ctsba,rac2,tfpi2,f13a1b,clcf1,f3a,sdc4,il10ra,f2r2.2,hbegfa,si:dkey-163m14.2,dkk1a,cxcl8a,il6st,lrrc32,im:7154036,hcar1-4,cxcl8b.1
10_Member	GO Biological Processes	GO:0031099	regeneration	-4.68666	-2.57509	22/187	30767,317638,321449,334724,335409,336038,373081,394066,394198,403033,405770,406397,406471,406625,406645,503594,562247,751668,797938,799377,100006778,100333407	stat3,igfbp1a,ccn2a,anxa1a,socs3a,junbb,mvp,lin28a,fosab,ccn1,il1b,mmp9,tnfrsf1a,lgmn,ctsba,il4r.1,clcf1,gck,hbegfa,dkk1a,il6st,adamts9
10_Member	GO Biological Processes	GO:0042060	wound healing	-4.37962	-2.33702	24/224	30767,334724,336038,337315,378986,394125,394198,403033,405770,406397,406471,406625,406645,560339,561287,567257,568593,777651,794365,797938,799082,799377,100148867,100320305	stat3,anxa1a,junbb,fgb,fga,rhoca,fosab,ccn1,il1b,mmp9,tnfrsf1a,lgmn,ctsba,tfpi2,f13a1b,f3a,sdc4,il10ra,f2r2.2,hbegfa,si:dkey-163m14.2,dkk1a,lrrc32,im:7154036
10_Member	GO Biological Processes	GO:0042246	tissue regeneration	-2.06892	-0.627642	12/126	30767,334724,336038,394198,403033,405770,406397,406471,406625,406645,797938,799377	stat3,anxa1a,junbb,fosab,ccn1,il1b,mmp9,tnfrsf1a,lgmn,ctsba,hbegfa,dkk1a
11_Summary	GO Biological Processes	GO:0072593	reactive oxygen species metabolic process	-5.7884	-3.48225	13/61	337514,378966,393386,393551,403014,445037,445318,497162,497166,541344,562473,563335,795305,559080	mpx,ncf1,cybb,cyba,ncf4,hbba2,nrros,si:ch211-5k11.8,hbaa2,prdx1,ncf2,zgc:163057,acod1,cftr
11_Member	GO Biological Processes	GO:0072593	reactive oxygen species metabolic process	-5.7884	-3.48225	13/61	337514,378966,393386,393551,403014,445037,445318,497162,497166,541344,562473,563335,795305	mpx,ncf1,cybb,cyba,ncf4,hbba2,nrros,si:ch211-5k11.8,hbaa2,prdx1,ncf2,zgc:163057,acod1
11_Member	GO Biological Processes	GO:0045730	respiratory burst	-4.77378	-2.65613	4/5	378966,403014,559080,562473	ncf1,ncf4,cftr,ncf2
11_Member	GO Biological Processes	GO:0006801	superoxide metabolic process	-4.43153	-2.36725	7/23	378966,393386,393551,403014,445318,541344,562473	ncf1,cybb,cyba,ncf4,nrros,prdx1,ncf2
11_Member	GO Biological Processes	GO:0042554	superoxide anion generation	-2.60522	-1.04456	3/7	393386,393551,562473	cybb,cyba,ncf2
12_Summary	GO Biological Processes	GO:0048584	positive regulation of response to stimulus	-5.62911	-3.34145	57/691	30631,321046,323588,334724,359834,393611,393772,402843,402991,403127,403135,403138,403139,405825,406304,406397,407664,431715,436923,497629,497646,553708,556770,562247,562317,562475,563884,567444,570404,570832,768172,768248,791140,792472,794365,794635,794891,796425,797938,799082,100002272,100003896,100006778,100101460,100136852,100170820,100270764,100321723,100331428,100331911,100331978,100334289,…	bmp2a,c3a.1,pik3r5,anxa1a,tgfb1a,c6,si:dkey-172h23.2,sfrp1a,gadd45ga,tlr1,tlr22,tlr5a,tlr5b,mfap4,gadd45ba,mmp9,hbegfb,rbck1,crlf1a,kitb,gadd45bb,pde6ga,gpr183a,clcf1,fadd,c7a,tgfb1b,irak3,il11a,c7b,zgc:153911,fas,cd276,cfbl,f2r2.2,c4b,ccl19a.1,card9,hbegfa,si:dkey-163m14.2,dusp22b,ccl34a.3,il6st,hcst,zgc:174863,ccl34a.4,cd40,si:dkey-192g7.3,c3a.4,ccl34b.8,ccl34b.9,map3k15,traf3ip2l,apela,ccl39.7…
12_Member	GO Biological Processes	GO:0048584	positive regulation of response to stimulus	-5.62911	-3.34145	57/691	30631,321046,323588,334724,359834,393611,393772,402843,402991,403127,403135,403138,403139,405825,406304,406397,407664,431715,436923,497629,497646,553708,556770,562247,562317,562475,563884,567444,570404,570832,768172,768248,791140,792472,794365,794635,794891,796425,797938,799082,100002272,100003896,100006778,100101460,100136852,100170820,100270764,100321723,100331428,100331911,100331978,100334289,…	bmp2a,c3a.1,pik3r5,anxa1a,tgfb1a,c6,si:dkey-172h23.2,sfrp1a,gadd45ga,tlr1,tlr22,tlr5a,tlr5b,mfap4,gadd45ba,mmp9,hbegfb,rbck1,crlf1a,kitb,gadd45bb,pde6ga,gpr183a,clcf1,fadd,c7a,tgfb1b,irak3,il11a,c7b,zgc:153911,fas,cd276,cfbl,f2r2.2,c4b,ccl19a.1,card9,hbegfa,si:dkey-163m14.2,dusp22b,ccl34a.3,il6st,hcst,zgc:174863,ccl34a.4,cd40,si:dkey-192g7.3,c3a.4,ccl34b.8,ccl34b.9,map3k15,traf3ip2l,apela,ccl39.7…
12_Member	GO Biological Processes	GO:0032270	positive regulation of cellular protein metabolic process	-5.05267	-2.8472	42/473	30590,30631,30647,30648,58022,323588,359834,368917,373114,394066,402991,406304,407664,436923,492763,493181,497629,497646,553708,556770,560193,561021,562247,563884,566600,570404,751765,768248,794891,797938,797943,100002272,100003896,100005593,100170820,100270764,100331911,100331978,100334289,100536023,100537869,108180095	tp53,bmp2a,psme2,psme1,casp8,pik3r5,tgfb1a,adam8a,cflara,lin28a,gadd45ga,gadd45ba,hbegfb,crlf1a,casp9,fgf7,kitb,gadd45bb,pde6ga,gpr183a,il34,casp22,clcf1,tgfb1b,si:ch211-284e13.9,il11a,pmaip1,fas,ccl19a.1,hbegfa,ppp1r15a,dusp22b,ccl34a.3,adam8b,ccl34a.4,cd40,ccl34b.8,ccl34b.9,map3k15,apela,ccl39.7,il11b
12_Member	GO Biological Processes	GO:0051345	positive regulation of hydrolase activity	-5.00101	-2.80546	23/192	30590,30647,30648,58022,373114,406711,406779,492763,555849,560581,561021,565801,751765,768248,794891,795086,796120,797943,100003896,100170820,100331911,100331978,100537869	tp53,psme2,psme1,casp8,cflara,grtp1a,tax1bp3,casp9,arhgap45b,asap2b,casp22,gmip,pmaip1,fas,ccl19a.1,si:dkey-33c9.6,si:dkey-238d18.4,ppp1r15a,ccl34a.3,ccl34a.4,ccl34b.8,ccl34b.9,ccl39.7
12_Member	GO Biological Processes	GO:0051247	positive regulation of protein metabolic process	-4.58016	-2.48632	42/495	30590,30631,30647,30648,58022,323588,359834,368917,373114,394066,402991,406304,407664,436923,492763,493181,497629,497646,553708,556770,560193,561021,562247,563884,566600,570404,751765,768248,794891,797938,797943,100002272,100003896,100005593,100170820,100270764,100331911,100331978,100334289,100536023,100537869,108180095	tp53,bmp2a,psme2,psme1,casp8,pik3r5,tgfb1a,adam8a,cflara,lin28a,gadd45ga,gadd45ba,hbegfb,crlf1a,casp9,fgf7,kitb,gadd45bb,pde6ga,gpr183a,il34,casp22,clcf1,tgfb1b,si:ch211-284e13.9,il11a,pmaip1,fas,ccl19a.1,hbegfa,ppp1r15a,dusp22b,ccl34a.3,adam8b,ccl34a.4,cd40,ccl34b.8,ccl34b.9,map3k15,apela,ccl39.7,il11b
12_Member	GO Biological Processes	GO:0051336	regulation of hydrolase activity	-4.04958	-2.13376	31/342	30590,30647,30648,58022,58122,334724,373102,373114,406650,406711,406779,492763,555849,560339,560581,561021,562273,565801,751765,768248,794891,795086,796120,797943,100003896,100037357,100136840,100170820,100331911,100331978,100537869	tp53,psme2,psme1,casp8,mcl1a,anxa1a,mcl1b,cflara,timp2b,grtp1a,tax1bp3,casp9,arhgap45b,tfpi2,asap2b,casp22,plxnc1,gmip,pmaip1,fas,ccl19a.1,si:dkey-33c9.6,si:dkey-238d18.4,ppp1r15a,ccl34a.3,tnfrsf1b,serpine1,ccl34a.4,ccl34b.8,ccl34b.9,ccl39.7
12_Member	GO Biological Processes	GO:1902531	regulation of intracellular signal transduction	-3.87727	-2.00422	44/566	58122,323588,327133,327292,352914,373102,393772,402991,405770,406304,406658,431715,436923,445073,497629,497646,553708,556770,562247,562301,567444,570404,767678,768248,794365,794891,796425,799082,100002272,100003896,100007521,100101460,100141338,100149048,100149745,100170820,100270764,100331911,100331978,100334289,100334940,100536023,100537869,108180095	mcl1a,pik3r5,hyou1,tpte,selenon,mcl1b,si:dkey-172h23.2,gadd45ga,il1b,gadd45ba,cnn2,rbck1,crlf1a,socs1a,kitb,gadd45bb,pde6ga,gpr183a,clcf1,akip1,irak3,il11a,cish,fas,f2r2.2,ccl19a.1,card9,si:dkey-163m14.2,dusp22b,ccl34a.3,socs1b,hcst,cyth4b,si:zfos-80g12.1,sesn2,ccl34a.4,cd40,ccl34b.8,ccl34b.9,map3k15,traf3ip2l,apela,ccl39.7,il11b
12_Member	GO Biological Processes	GO:1902533	positive regulation of intracellular signal transduction	-3.85664	-1.98811	28/303	323588,393772,402991,406304,431715,436923,497629,497646,553708,556770,562247,570404,794365,794891,796425,799082,100002272,100003896,100101460,100170820,100270764,100331911,100331978,100334289,100334940,100536023,100537869,108180095	pik3r5,si:dkey-172h23.2,gadd45ga,gadd45ba,rbck1,crlf1a,kitb,gadd45bb,pde6ga,gpr183a,clcf1,il11a,f2r2.2,ccl19a.1,card9,si:dkey-163m14.2,dusp22b,ccl34a.3,hcst,ccl34a.4,cd40,ccl34b.8,ccl34b.9,map3k15,traf3ip2l,apela,ccl39.7,il11b
12_Member	GO Biological Processes	GO:0001934	positive regulation of protein phosphorylation	-3.53059	-1.76852	28/317	30631,323588,359834,402991,406304,407664,436923,493181,497629,497646,553708,556770,560193,562247,563884,570404,794891,797938,100002272,100003896,100170820,100270764,100331911,100331978,100334289,100536023,100537869,108180095	bmp2a,pik3r5,tgfb1a,gadd45ga,gadd45ba,hbegfb,crlf1a,fgf7,kitb,gadd45bb,pde6ga,gpr183a,il34,clcf1,tgfb1b,il11a,ccl19a.1,hbegfa,dusp22b,ccl34a.3,ccl34a.4,cd40,ccl34b.8,ccl34b.9,map3k15,apela,ccl39.7,il11b
12_Member	GO Biological Processes	GO:0043408	regulation of MAPK cascade	-3.35486	-1.63354	21/215	323588,402991,406304,406658,497629,497646,553708,556770,567444,570404,768248,794891,100002272,100003896,100170820,100331911,100331978,100334289,100536023,100537869,108180095	pik3r5,gadd45ga,gadd45ba,cnn2,kitb,gadd45bb,pde6ga,gpr183a,irak3,il11a,fas,ccl19a.1,dusp22b,ccl34a.3,ccl34a.4,ccl34b.8,ccl34b.9,map3k15,apela,ccl39.7,il11b
12_Member	GO Biological Processes	GO:0044093	positive regulation of molecular function	-3.35185	-1.63337	37/476	30590,30647,30648,58022,323588,373114,402991,406304,406711,406779,407664,492763,497629,497646,553708,555849,557091,560581,561021,565801,567444,751765,768248,794891,795086,796120,797938,797943,100002463,100003896,100170820,100270764,100331911,100331978,100334289,100334750,100537869	tp53,psme2,psme1,casp8,pik3r5,cflara,gadd45ga,gadd45ba,grtp1a,tax1bp3,hbegfb,casp9,kitb,gadd45bb,pde6ga,arhgap45b,wnk4b,asap2b,casp22,gmip,irak3,pmaip1,fas,ccl19a.1,si:dkey-33c9.6,si:dkey-238d18.4,hbegfa,ppp1r15a,pprc1,ccl34a.3,ccl34a.4,cd40,ccl34b.8,ccl34b.9,map3k15,bcl10,ccl39.7
12_Member	GO Biological Processes	GO:0043410	positive regulation of MAPK cascade	-3.31101	-1.60447	18/172	323588,402991,406304,497629,497646,553708,556770,570404,794891,100002272,100003896,100170820,100331911,100331978,100334289,100536023,100537869,108180095	pik3r5,gadd45ga,gadd45ba,kitb,gadd45bb,pde6ga,gpr183a,il11a,ccl19a.1,dusp22b,ccl34a.3,ccl34a.4,ccl34b.8,ccl34b.9,map3k15,apela,ccl39.7,il11b
12_Member	GO Biological Processes	GO:0001932	regulation of protein phosphorylation	-3.10431	-1.44503	35/456	30631,323588,359834,402991,406304,406658,407664,436923,445073,493181,497629,497646,553269,553708,556770,560193,562247,563884,566600,567444,570404,768248,794891,797938,100002272,100003896,100004175,100170820,100270764,100331911,100331978,100334289,100536023,100537869,108180095	bmp2a,pik3r5,tgfb1a,gadd45ga,gadd45ba,cnn2,hbegfb,crlf1a,socs1a,fgf7,kitb,gadd45bb,ccnl1a,pde6ga,gpr183a,il34,clcf1,tgfb1b,si:ch211-284e13.9,irak3,il11a,fas,ccl19a.1,hbegfa,dusp22b,ccl34a.3,cdkn1cb,ccl34a.4,cd40,ccl34b.8,ccl34b.9,map3k15,apela,ccl39.7,il11b
12_Member	GO Biological Processes	GO:0043085	positive regulation of catalytic activity	-3.05909	-1.40825	32/407	30590,30647,30648,58022,323588,373114,402991,406304,406711,406779,407664,492763,497629,497646,553708,555849,560581,561021,565801,751765,768248,794891,795086,796120,797938,797943,100003896,100170820,100331911,100331978,100334289,100537869	tp53,psme2,psme1,casp8,pik3r5,cflara,gadd45ga,gadd45ba,grtp1a,tax1bp3,hbegfb,casp9,kitb,gadd45bb,pde6ga,arhgap45b,asap2b,casp22,gmip,pmaip1,fas,ccl19a.1,si:dkey-33c9.6,si:dkey-238d18.4,hbegfa,ppp1r15a,ccl34a.3,ccl34a.4,ccl34b.8,ccl34b.9,map3k15,ccl39.7
12_Member	GO Biological Processes	GO:0009967	positive regulation of signal transduction	-3.04483	-1.39815	36/477	30631,323588,359834,393772,402843,402991,406304,407664,431715,436923,497629,497646,553708,556770,562247,562317,563884,570404,768248,794365,794891,796425,797938,799082,100002272,100003896,100101460,100170820,100270764,100331911,100331978,100334289,100334940,100536023,100537869,108180095	bmp2a,pik3r5,tgfb1a,si:dkey-172h23.2,sfrp1a,gadd45ga,gadd45ba,hbegfb,rbck1,crlf1a,kitb,gadd45bb,pde6ga,gpr183a,clcf1,fadd,tgfb1b,il11a,fas,f2r2.2,ccl19a.1,card9,hbegfa,si:dkey-163m14.2,dusp22b,ccl34a.3,hcst,ccl34a.4,cd40,ccl34b.8,ccl34b.9,map3k15,traf3ip2l,apela,ccl39.7,il11b
12_Member	GO Biological Processes	GO:0031401	positive regulation of protein modification process	-2.8773	-1.26442	29/366	30631,323588,359834,402991,406304,407664,436923,493181,497629,497646,553708,556770,560193,562247,563884,570404,794891,797938,797943,100002272,100003896,100170820,100270764,100331911,100331978,100334289,100536023,100537869,108180095	bmp2a,pik3r5,tgfb1a,gadd45ga,gadd45ba,hbegfb,crlf1a,fgf7,kitb,gadd45bb,pde6ga,gpr183a,il34,clcf1,tgfb1b,il11a,ccl19a.1,hbegfa,ppp1r15a,dusp22b,ccl34a.3,ccl34a.4,cd40,ccl34b.8,ccl34b.9,map3k15,apela,ccl39.7,il11b
12_Member	GO Biological Processes	GO:0000165	MAPK cascade	-2.85636	-1.24918	21/235	323588,402991,406304,406658,497629,497646,553708,556770,567444,570404,768248,794891,100002272,100003896,100170820,100331911,100331978,100334289,100536023,100537869,108180095	pik3r5,gadd45ga,gadd45ba,cnn2,kitb,gadd45bb,pde6ga,gpr183a,irak3,il11a,fas,ccl19a.1,dusp22b,ccl34a.3,ccl34a.4,ccl34b.8,ccl34b.9,map3k15,apela,ccl39.7,il11b
12_Member	GO Biological Processes	GO:0023014	signal transduction by protein phosphorylation	-2.72131	-1.14334	21/241	323588,402991,406304,406658,497629,497646,553708,556770,567444,570404,768248,794891,100002272,100003896,100170820,100331911,100331978,100334289,100536023,100537869,108180095	pik3r5,gadd45ga,gadd45ba,cnn2,kitb,gadd45bb,pde6ga,gpr183a,irak3,il11a,fas,ccl19a.1,dusp22b,ccl34a.3,ccl34a.4,ccl34b.8,ccl34b.9,map3k15,apela,ccl39.7,il11b
12_Member	GO Biological Processes	GO:0010562	positive regulation of phosphorus metabolic process	-2.6505	-1.08127	29/379	30631,323588,359834,402991,406304,407664,436923,493181,497629,497646,553708,556770,560193,562247,563884,570404,794891,797938,797943,100002272,100003896,100170820,100270764,100331911,100331978,100334289,100536023,100537869,108180095	bmp2a,pik3r5,tgfb1a,gadd45ga,gadd45ba,hbegfb,crlf1a,fgf7,kitb,gadd45bb,pde6ga,gpr183a,il34,clcf1,tgfb1b,il11a,ccl19a.1,hbegfa,ppp1r15a,dusp22b,ccl34a.3,ccl34a.4,cd40,ccl34b.8,ccl34b.9,map3k15,apela,ccl39.7,il11b
12_Member	GO Biological Processes	GO:0045937	positive regulation of phosphate metabolic process	-2.6505	-1.08127	29/379	30631,323588,359834,402991,406304,407664,436923,493181,497629,497646,553708,556770,560193,562247,563884,570404,794891,797938,797943,100002272,100003896,100170820,100270764,100331911,100331978,100334289,100536023,100537869,108180095	bmp2a,pik3r5,tgfb1a,gadd45ga,gadd45ba,hbegfb,crlf1a,fgf7,kitb,gadd45bb,pde6ga,gpr183a,il34,clcf1,tgfb1b,il11a,ccl19a.1,hbegfa,ppp1r15a,dusp22b,ccl34a.3,ccl34a.4,cd40,ccl34b.8,ccl34b.9,map3k15,apela,ccl39.7,il11b
12_Member	GO Biological Processes	GO:0010647	positive regulation of cell communication	-2.5772	-1.02327	37/526	30631,323588,359834,393772,402843,402991,406304,407664,431715,436923,497629,497646,553708,556770,562247,562317,563884,570404,751668,768248,794365,794891,796425,797938,799082,100002272,100003896,100101460,100170820,100270764,100331911,100331978,100334289,100334940,100536023,100537869,108180095	bmp2a,pik3r5,tgfb1a,si:dkey-172h23.2,sfrp1a,gadd45ga,gadd45ba,hbegfb,rbck1,crlf1a,kitb,gadd45bb,pde6ga,gpr183a,clcf1,fadd,tgfb1b,il11a,gck,fas,f2r2.2,ccl19a.1,card9,hbegfa,si:dkey-163m14.2,dusp22b,ccl34a.3,hcst,ccl34a.4,cd40,ccl34b.8,ccl34b.9,map3k15,traf3ip2l,apela,ccl39.7,il11b
12_Member	GO Biological Processes	GO:0023056	positive regulation of signaling	-2.56338	-1.01278	37/527	30631,323588,359834,393772,402843,402991,406304,407664,431715,436923,497629,497646,553708,556770,562247,562317,563884,570404,751668,768248,794365,794891,796425,797938,799082,100002272,100003896,100101460,100170820,100270764,100331911,100331978,100334289,100334940,100536023,100537869,108180095	bmp2a,pik3r5,tgfb1a,si:dkey-172h23.2,sfrp1a,gadd45ga,gadd45ba,hbegfb,rbck1,crlf1a,kitb,gadd45bb,pde6ga,gpr183a,clcf1,fadd,tgfb1b,il11a,gck,fas,f2r2.2,ccl19a.1,card9,hbegfa,si:dkey-163m14.2,dusp22b,ccl34a.3,hcst,ccl34a.4,cd40,ccl34b.8,ccl34b.9,map3k15,traf3ip2l,apela,ccl39.7,il11b
12_Member	GO Biological Processes	GO:0042327	positive regulation of phosphorylation	-2.52732	-0.981658	28/369	30631,323588,359834,402991,406304,407664,436923,493181,497629,497646,553708,556770,560193,562247,563884,570404,794891,797938,100002272,100003896,100170820,100270764,100331911,100331978,100334289,100536023,100537869,108180095	bmp2a,pik3r5,tgfb1a,gadd45ga,gadd45ba,hbegfb,crlf1a,fgf7,kitb,gadd45bb,pde6ga,gpr183a,il34,clcf1,tgfb1b,il11a,ccl19a.1,hbegfa,dusp22b,ccl34a.3,ccl34a.4,cd40,ccl34b.8,ccl34b.9,map3k15,apela,ccl39.7,il11b
12_Member	GO Biological Processes	GO:0043547	positive regulation of GTPase activity	-2.49326	-0.960431	13/126	406711,406779,555849,560581,565801,794891,795086,796120,100003896,100170820,100331911,100331978,100537869	grtp1a,tax1bp3,arhgap45b,asap2b,gmip,ccl19a.1,si:dkey-33c9.6,si:dkey-238d18.4,ccl34a.3,ccl34a.4,ccl34b.8,ccl34b.9,ccl39.7
12_Member	GO Biological Processes	GO:0031399	regulation of protein modification process	-2.1164	-0.667317	37/562	30631,323588,359834,402991,406304,406658,407664,436923,445073,493181,497629,497646,553269,553708,556770,560193,562247,563884,566600,567444,570404,768248,794891,797792,797938,797943,100002272,100003896,100004175,100170820,100270764,100331911,100331978,100334289,100536023,100537869,108180095	bmp2a,pik3r5,tgfb1a,gadd45ga,gadd45ba,cnn2,hbegfb,crlf1a,socs1a,fgf7,kitb,gadd45bb,ccnl1a,pde6ga,gpr183a,il34,clcf1,tgfb1b,si:ch211-284e13.9,irak3,il11a,fas,ccl19a.1,pargl,hbegfa,ppp1r15a,dusp22b,ccl34a.3,cdkn1cb,ccl34a.4,cd40,ccl34b.8,ccl34b.9,map3k15,apela,ccl39.7,il11b
12_Member	GO Biological Processes	GO:0050790	regulation of catalytic activity	-2.01388	-0.583335	44/705	30590,30647,30648,58022,58122,323588,334724,373102,373114,402991,406304,406645,406650,406711,406779,407664,492763,497629,497646,553269,553708,555849,560339,560581,561021,562273,565801,567444,751765,768248,794891,795086,796120,797938,797943,100003896,100004175,100037357,100136840,100170820,100331911,100331978,100334289,100537869	tp53,psme2,psme1,casp8,mcl1a,pik3r5,anxa1a,mcl1b,cflara,gadd45ga,gadd45ba,ctsba,timp2b,grtp1a,tax1bp3,hbegfb,casp9,kitb,gadd45bb,ccnl1a,pde6ga,arhgap45b,tfpi2,asap2b,casp22,plxnc1,gmip,irak3,pmaip1,fas,ccl19a.1,si:dkey-33c9.6,si:dkey-238d18.4,hbegfa,ppp1r15a,ccl34a.3,cdkn1cb,tnfrsf1b,serpine1,ccl34a.4,ccl34b.8,ccl34b.9,map3k15,ccl39.7
13_Summary	GO Biological Processes	GO:1901655	cellular response to ketone	-5.60615	-3.33622	6/11	393608,402837,406473,559080,570410,100005416,569142,321837,386661,100149048,100149745,30464	ptger2a,hamp,pck2,cftr,ptger2b,ptger4b,entpd2b,keap1a,scd,si:zfos-80g12.1,sesn2,rxrga
13_Member	GO Biological Processes	GO:1901655	cellular response to ketone	-5.60615	-3.33622	6/11	393608,402837,406473,559080,570410,100005416	ptger2a,hamp,pck2,cftr,ptger2b,ptger4b
13_Member	GO Biological Processes	GO:1901654	response to ketone	-4.27545	-2.25593	6/17	393608,402837,406473,559080,570410,100005416	ptger2a,hamp,pck2,cftr,ptger2b,ptger4b
13_Member	GO Biological Processes	GO:0097306	cellular response to alcohol	-4.03514	-2.12493	5/12	393608,559080,569142,570410,100005416	ptger2a,cftr,entpd2b,ptger2b,ptger4b
13_Member	GO Biological Processes	GO:0071379	cellular response to prostaglandin stimulus	-3.67321	-1.86267	4/8	321837,393608,570410,100005416	keap1a,ptger2a,ptger2b,ptger4b
13_Member	GO Biological Processes	GO:0070542	response to fatty acid	-3.50349	-1.75469	5/15	321837,386661,393608,570410,100005416	keap1a,scd,ptger2a,ptger2b,ptger4b
13_Member	GO Biological Processes	GO:0071398	cellular response to fatty acid	-3.43308	-1.70223	4/9	321837,393608,570410,100005416	keap1a,ptger2a,ptger2b,ptger4b
13_Member	GO Biological Processes	GO:0034694	response to prostaglandin	-3.22635	-1.53391	4/10	321837,393608,570410,100005416	keap1a,ptger2a,ptger2b,ptger4b
13_Member	GO Biological Processes	GO:0034695	response to prostaglandin E	-3.12089	-1.45084	3/5	393608,570410,100005416	ptger2a,ptger2b,ptger4b
13_Member	GO Biological Processes	GO:0071380	cellular response to prostaglandin E stimulus	-3.12089	-1.45084	3/5	393608,570410,100005416	ptger2a,ptger2b,ptger4b
13_Member	GO Biological Processes	GO:0071229	cellular response to acid chemical	-2.82878	-1.23642	7/40	321837,393608,569142,570410,100005416,100149048,100149745	keap1a,ptger2a,entpd2b,ptger2b,ptger4b,si:zfos-80g12.1,sesn2
13_Member	GO Biological Processes	GO:0001101	response to acid chemical	-2.82875	-1.23642	9/63	30464,321837,386661,393608,569142,570410,100005416,100149048,100149745	rxrga,keap1a,scd,ptger2a,entpd2b,ptger2b,ptger4b,si:zfos-80g12.1,sesn2
13_Member	GO Biological Processes	GO:0097305	response to alcohol	-2.41179	-0.893132	5/25	393608,559080,569142,570410,100005416	ptger2a,cftr,entpd2b,ptger2b,ptger4b
14_Summary	GO Biological Processes	GO:0002521	leukocyte differentiation	-5.50199	-3.24066	18/118	30117,30280,30481,334724,335474,436895,445318,497629,555766,556770,559295,560193,561370,641560,751704,767678,100270759,100885851,30590,64607,280650,406463,560339,100037357	spi1b,jak1,gata1a,anxa1a,arpc1b,irf8,nrros,kitb,etsrp,gpr183a,ada2b,il34,jak3,slc7a7,spi1a,cish,csf3a,il6,tp53,alas2,klf6a,nfkbiaa,tfpi2,tnfrsf1b
14_Member	GO Biological Processes	GO:0002521	leukocyte differentiation	-5.50199	-3.24066	18/118	30117,30280,30481,334724,335474,436895,445318,497629,555766,556770,559295,560193,561370,641560,751704,767678,100270759,100885851	spi1b,jak1,gata1a,anxa1a,arpc1b,irf8,nrros,kitb,etsrp,gpr183a,ada2b,il34,jak3,slc7a7,spi1a,cish,csf3a,il6
14_Member	GO Biological Processes	GO:0030225	macrophage differentiation	-5.4331	-3.1802	7/17	30117,30481,436895,445318,560193,641560,100270759	spi1b,gata1a,irf8,nrros,il34,slc7a7,csf3a
14_Member	GO Biological Processes	GO:0014005	microglia development	-4.77378	-2.65613	4/5	436895,445318,560193,641560	irf8,nrros,il34,slc7a7
14_Member	GO Biological Processes	GO:0002573	myeloid leukocyte differentiation	-4.48142	-2.41014	11/58	30117,30481,436895,445318,555766,556770,559295,560193,641560,751704,100270759	spi1b,gata1a,irf8,nrros,etsrp,gpr183a,ada2b,il34,slc7a7,spi1a,csf3a
14_Member	GO Biological Processes	GO:0014004	microglia differentiation	-3.95908	-2.06572	4/7	436895,445318,560193,641560	irf8,nrros,il34,slc7a7
14_Member	GO Biological Processes	GO:0030223	neutrophil differentiation	-3.2487	-1.55163	6/25	30117,30481,436895,555766,559295,100270759	spi1b,gata1a,irf8,etsrp,ada2b,csf3a
14_Member	GO Biological Processes	GO:0061515	myeloid cell development	-3.08423	-1.4313	10/70	30117,30481,30590,64607,280650,436895,445318,560193,641560,100270759	spi1b,gata1a,tp53,alas2,klf6a,irf8,nrros,il34,slc7a7,csf3a
14_Member	GO Biological Processes	GO:1903706	regulation of hemopoiesis	-3.01302	-1.3684	11/84	30117,30481,280650,334724,406463,436895,560193,560339,751704,767678,100037357	spi1b,gata1a,klf6a,anxa1a,nfkbiaa,irf8,il34,tfpi2,spi1a,cish,tnfrsf1b
14_Member	GO Biological Processes	GO:0030851	granulocyte differentiation	-2.88431	-1.26934	6/29	30117,30481,436895,555766,559295,100270759	spi1b,gata1a,irf8,etsrp,ada2b,csf3a
14_Member	GO Biological Processes	GO:0045637	regulation of myeloid cell differentiation	-2.80339	-1.21288	6/30	30117,30481,436895,560193,751704,767678	spi1b,gata1a,irf8,il34,spi1a,cish
14_Member	GO Biological Processes	GO:1902105	regulation of leukocyte differentiation	-2.51213	-0.972976	6/34	30117,334724,436895,560193,751704,767678	spi1b,anxa1a,irf8,il34,spi1a,cish
14_Member	GO Biological Processes	GO:0002761	regulation of myeloid leukocyte differentiation	-2.37872	-0.869212	4/16	30117,436895,560193,751704	spi1b,irf8,il34,spi1a
14_Member	GO Biological Processes	GO:1903707	negative regulation of hemopoiesis	-2.18295	-0.71098	4/18	30117,334724,406463,767678	spi1b,anxa1a,nfkbiaa,cish
14_Member	GO Biological Processes	GO:1902106	negative regulation of leukocyte differentiation	-2.11247	-0.667317	3/10	30117,334724,767678	spi1b,anxa1a,cish
15_Summary	GO Biological Processes	GO:0031347	regulation of defense response	-5.25478	-3.02624	17/111	334724,393387,403127,403135,403138,403139,406397,406471,445073,567444,678516,792160,100002292,100002946,100005416,100007521,100270764,30590,327133,335409,562247,566600,768248,794365,797792,799082,100002272,100006778,100149048,100149745,406272,415151,556770,557258,559080	anxa1a,ggt1a,tlr1,tlr22,tlr5a,tlr5b,mmp9,tnfrsf1a,socs1a,irak3,tnfaip6,irf1b,si:ch73-63e15.2,cxcl8a,ptger4b,socs1b,cd40,tp53,hyou1,socs3a,clcf1,si:ch211-284e13.9,fas,f2r2.2,pargl,si:dkey-163m14.2,dusp22b,il6st,si:zfos-80g12.1,sesn2,sema6d,rac2,gpr183a,ptk2ba,cftr
15_Member	GO Biological Processes	GO:0031347	regulation of defense response	-5.25478	-3.02624	17/111	334724,393387,403127,403135,403138,403139,406397,406471,445073,567444,678516,792160,100002292,100002946,100005416,100007521,100270764	anxa1a,ggt1a,tlr1,tlr22,tlr5a,tlr5b,mmp9,tnfrsf1a,socs1a,irak3,tnfaip6,irf1b,si:ch73-63e15.2,cxcl8a,ptger4b,socs1b,cd40
15_Member	GO Biological Processes	GO:0080134	regulation of response to stress	-4.92831	-2.77895	30/293	30590,327133,334724,335409,393387,403127,403135,403138,403139,406397,406471,445073,562247,566600,567444,678516,768248,792160,794365,797792,799082,100002272,100002292,100002946,100005416,100006778,100007521,100149048,100149745,100270764	tp53,hyou1,anxa1a,socs3a,ggt1a,tlr1,tlr22,tlr5a,tlr5b,mmp9,tnfrsf1a,socs1a,clcf1,si:ch211-284e13.9,irak3,tnfaip6,fas,irf1b,f2r2.2,pargl,si:dkey-163m14.2,dusp22b,si:ch73-63e15.2,cxcl8a,ptger4b,il6st,socs1b,si:zfos-80g12.1,sesn2,cd40
15_Member	GO Biological Processes	GO:0032101	regulation of response to external stimulus	-4.50355	-2.42674	20/165	334724,335409,393387,403127,406272,406397,406471,415151,556770,557258,559080,562247,678516,792160,794365,799082,100002292,100002946,100005416,100006778	anxa1a,socs3a,ggt1a,tlr1,sema6d,mmp9,tnfrsf1a,rac2,gpr183a,ptk2ba,cftr,clcf1,tnfaip6,irf1b,f2r2.2,si:dkey-163m14.2,si:ch73-63e15.2,cxcl8a,ptger4b,il6st
15_Member	GO Biological Processes	GO:0050727	regulation of inflammatory response	-3.58659	-1.80036	9/50	334724,393387,403127,406397,406471,678516,100002292,100002946,100005416	anxa1a,ggt1a,tlr1,mmp9,tnfrsf1a,tnfaip6,si:ch73-63e15.2,cxcl8a,ptger4b
16_Summary	GO Biological Processes	GO:0048246	macrophage chemotaxis	-4.63626	-2.53659	6/15	325599,387293,393551,405770,415151,791973	lgals3b,mmp13a,cyba,il1b,rac2,cxcr3.2
16_Member	GO Biological Processes	GO:0048246	macrophage chemotaxis	-4.63626	-2.53659	6/15	325599,387293,393551,405770,415151,791973	lgals3b,mmp13a,cyba,il1b,rac2,cxcr3.2
16_Member	GO Biological Processes	GO:1905517	macrophage migration	-4.27545	-2.25593	6/17	325599,387293,393551,405770,415151,791973	lgals3b,mmp13a,cyba,il1b,rac2,cxcr3.2
17_Summary	GO Biological Processes	GO:0045123	cellular extravasation	-4.31187	-2.28248	4/6	368917,415151,100005593,100884146,406650	adam8a,rac2,adam8b,selplg,timp2b
17_Member	GO Biological Processes	GO:0045123	cellular extravasation	-4.31187	-2.28248	4/6	368917,415151,100005593,100884146	adam8a,rac2,adam8b,selplg
17_Member	GO Biological Processes	GO:0002691	regulation of cellular extravasation	-3.12089	-1.45084	3/5	368917,415151,100005593	adam8a,rac2,adam8b
17_Member	GO Biological Processes	GO:0002693	positive regulation of cellular extravasation	-3.12089	-1.45084	3/5	368917,415151,100005593	adam8a,rac2,adam8b
17_Member	GO Biological Processes	GO:0051043	regulation of membrane protein ectodomain proteolysis	-2.83407	-1.23642	3/6	368917,406650,100005593	adam8a,timp2b,adam8b
18_Summary	GO Biological Processes	GO:0010942	positive regulation of cell death	-4.19872	-2.20295	15/108	30590,58022,334724,373114,449994,492763,553622,561021,562317,566604,569267,751765,767645,768248,100270764,30647,30648,58122,373102,406650,560339,100037357,100136840,30481,58054,266985,321449,325599,327133,335409,403033,406304,406596,566600,568416,568780,571217,723996,796425,100001066,100124530,100334750,101882478,368917,100005593,373130,404605,406290,541319,553634,560966,792160,100330352,101884911	tp53,casp8,anxa1a,cflara,pawr,casp9,phlda2,casp22,fadd,casp3b,plekhn1,pmaip1,zgc:153993,fas,cd40,psme2,psme1,mcl1a,mcl1b,timp2b,tfpi2,tnfrsf1b,serpine1,gata1a,pim2,npm1a,ccn2a,lgals3b,hyou1,socs3a,ccn1,gadd45ba,socs3b,si:ch211-284e13.9,wt1b,zgc:158343,tnfrsf18,tnfaip8l2a,card9,si:dkey-10c21.1,ccn2b,bcl10,si:dkey-118k5.3,adam8a,adam8b,dffb,relt,itpk1a,crip1,casp7,si:ch211-158d24.4,irf1b,si:ch73-36…
18_Member	GO Biological Processes	GO:0010942	positive regulation of cell death	-4.19872	-2.20295	15/108	30590,58022,334724,373114,449994,492763,553622,561021,562317,566604,569267,751765,767645,768248,100270764	tp53,casp8,anxa1a,cflara,pawr,casp9,phlda2,casp22,fadd,casp3b,plekhn1,pmaip1,zgc:153993,fas,cd40
18_Member	GO Biological Processes	GO:0043065	positive regulation of apoptotic process	-4.19872	-2.20295	15/108	30590,58022,334724,373114,449994,492763,553622,561021,562317,566604,569267,751765,767645,768248,100270764	tp53,casp8,anxa1a,cflara,pawr,casp9,phlda2,casp22,fadd,casp3b,plekhn1,pmaip1,zgc:153993,fas,cd40
18_Member	GO Biological Processes	GO:0043068	positive regulation of programmed cell death	-4.19872	-2.20295	15/108	30590,58022,334724,373114,449994,492763,553622,561021,562317,566604,569267,751765,767645,768248,100270764	tp53,casp8,anxa1a,cflara,pawr,casp9,phlda2,casp22,fadd,casp3b,plekhn1,pmaip1,zgc:153993,fas,cd40
18_Member	GO Biological Processes	GO:0052547	regulation of peptidase activity	-4.19872	-2.20295	15/108	30590,30647,30648,58022,58122,373102,373114,406650,492763,560339,561021,751765,768248,100037357,100136840	tp53,psme2,psme1,casp8,mcl1a,mcl1b,cflara,timp2b,casp9,tfpi2,casp22,pmaip1,fas,tnfrsf1b,serpine1
18_Member	GO Biological Processes	GO:0010950	positive regulation of endopeptidase activity	-4.11659	-2.16088	9/43	30590,30647,30648,58022,373114,492763,561021,751765,768248	tp53,psme2,psme1,casp8,cflara,casp9,casp22,pmaip1,fas
18_Member	GO Biological Processes	GO:0010952	positive regulation of peptidase activity	-4.11659	-2.16088	9/43	30590,30647,30648,58022,373114,492763,561021,751765,768248	tp53,psme2,psme1,casp8,cflara,casp9,casp22,pmaip1,fas
18_Member	GO Biological Processes	GO:0043281	regulation of cysteine-type endopeptidase activity involved in apoptotic process	-4.03314	-2.12493	10/54	30590,58022,58122,373102,373114,492763,561021,751765,768248,100037357	tp53,casp8,mcl1a,mcl1b,cflara,casp9,casp22,pmaip1,fas,tnfrsf1b
18_Member	GO Biological Processes	GO:0052548	regulation of endopeptidase activity	-3.90188	-2.01934	14/102	30590,30647,30648,58022,58122,373102,373114,406650,492763,561021,751765,768248,100037357,100136840	tp53,psme2,psme1,casp8,mcl1a,mcl1b,cflara,timp2b,casp9,casp22,pmaip1,fas,tnfrsf1b,serpine1
18_Member	GO Biological Processes	GO:2000116	regulation of cysteine-type endopeptidase activity	-3.82766	-1.98586	10/57	30590,58022,58122,373102,373114,492763,561021,751765,768248,100037357	tp53,casp8,mcl1a,mcl1b,cflara,casp9,casp22,pmaip1,fas,tnfrsf1b
18_Member	GO Biological Processes	GO:0010941	regulation of cell death	-3.6186	-1.81405	38/478	30481,30590,58022,58054,58122,266985,321449,325599,327133,334724,335409,373102,373114,403033,406304,406596,449994,492763,553622,561021,562317,566600,566604,568416,568780,569267,571217,723996,751765,767645,768248,796425,100001066,100037357,100124530,100270764,100334750,101882478	gata1a,tp53,casp8,pim2,mcl1a,npm1a,ccn2a,lgals3b,hyou1,anxa1a,socs3a,mcl1b,cflara,ccn1,gadd45ba,socs3b,pawr,casp9,phlda2,casp22,fadd,si:ch211-284e13.9,casp3b,wt1b,zgc:158343,plekhn1,tnfrsf18,tnfaip8l2a,pmaip1,zgc:153993,fas,card9,si:dkey-10c21.1,tnfrsf1b,ccn2b,cd40,bcl10,si:dkey-118k5.3
18_Member	GO Biological Processes	GO:0045862	positive regulation of proteolysis	-3.59079	-1.80036	12/84	30590,30647,30648,58022,368917,373114,492763,561021,566600,751765,768248,100005593	tp53,psme2,psme1,casp8,adam8a,cflara,casp9,casp22,si:ch211-284e13.9,pmaip1,fas,adam8b
18_Member	GO Biological Processes	GO:0008219	cell death	-3.49947	-1.75329	47/642	30481,30590,58022,58054,58122,266985,321449,325599,327133,334724,335409,373102,373114,373130,403033,404605,406290,406304,406596,449994,492763,541319,553622,553634,560966,561021,562317,566600,566604,568416,568780,569267,571217,723996,751765,767645,768248,792160,796425,100001066,100037357,100124530,100270764,100330352,100334750,101882478,101884911	gata1a,tp53,casp8,pim2,mcl1a,npm1a,ccn2a,lgals3b,hyou1,anxa1a,socs3a,mcl1b,cflara,dffb,ccn1,relt,itpk1a,gadd45ba,socs3b,pawr,casp9,crip1,phlda2,casp7,si:ch211-158d24.4,casp22,fadd,si:ch211-284e13.9,casp3b,wt1b,zgc:158343,plekhn1,tnfrsf18,tnfaip8l2a,pmaip1,zgc:153993,fas,irf1b,card9,si:dkey-10c21.1,tnfrsf1b,ccn2b,cd40,si:ch73-361p23.3,bcl10,si:dkey-118k5.3,gsdmea
18_Member	GO Biological Processes	GO:0030162	regulation of proteolysis	-3.34155	-1.6255	18/171	30590,30647,30648,58022,58122,368917,373102,373114,406650,492763,560339,561021,566600,751765,768248,100005593,100037357,100136840	tp53,psme2,psme1,casp8,mcl1a,adam8a,mcl1b,cflara,timp2b,casp9,tfpi2,casp22,si:ch211-284e13.9,pmaip1,fas,adam8b,tnfrsf1b,serpine1
18_Member	GO Biological Processes	GO:0042981	regulation of apoptotic process	-3.32982	-1.6168	35/443	30481,30590,58022,58054,58122,266985,325599,327133,334724,335409,373102,373114,406304,406596,449994,492763,553622,561021,562317,566600,566604,568416,568780,569267,571217,723996,751765,767645,768248,796425,100001066,100037357,100270764,100334750,101882478	gata1a,tp53,casp8,pim2,mcl1a,npm1a,lgals3b,hyou1,anxa1a,socs3a,mcl1b,cflara,gadd45ba,socs3b,pawr,casp9,phlda2,casp22,fadd,si:ch211-284e13.9,casp3b,wt1b,zgc:158343,plekhn1,tnfrsf18,tnfaip8l2a,pmaip1,zgc:153993,fas,card9,si:dkey-10c21.1,tnfrsf1b,cd40,bcl10,si:dkey-118k5.3
18_Member	GO Biological Processes	GO:0043067	regulation of programmed cell death	-3.24147	-1.54673	35/448	30481,30590,58022,58054,58122,266985,325599,327133,334724,335409,373102,373114,406304,406596,449994,492763,553622,561021,562317,566600,566604,568416,568780,569267,571217,723996,751765,767645,768248,796425,100001066,100037357,100270764,100334750,101882478	gata1a,tp53,casp8,pim2,mcl1a,npm1a,lgals3b,hyou1,anxa1a,socs3a,mcl1b,cflara,gadd45ba,socs3b,pawr,casp9,phlda2,casp22,fadd,si:ch211-284e13.9,casp3b,wt1b,zgc:158343,plekhn1,tnfrsf18,tnfaip8l2a,pmaip1,zgc:153993,fas,card9,si:dkey-10c21.1,tnfrsf1b,cd40,bcl10,si:dkey-118k5.3
18_Member	GO Biological Processes	GO:0012501	programmed cell death	-2.92228	-1.28984	43/610	30481,30590,58022,58054,58122,266985,325599,327133,334724,335409,373102,373114,373130,404605,406290,406304,406596,449994,492763,541319,553622,553634,560966,561021,562317,566600,566604,568416,568780,569267,571217,723996,751765,767645,768248,792160,796425,100001066,100037357,100270764,100330352,100334750,101882478	gata1a,tp53,casp8,pim2,mcl1a,npm1a,lgals3b,hyou1,anxa1a,socs3a,mcl1b,cflara,dffb,relt,itpk1a,gadd45ba,socs3b,pawr,casp9,crip1,phlda2,casp7,si:ch211-158d24.4,casp22,fadd,si:ch211-284e13.9,casp3b,wt1b,zgc:158343,plekhn1,tnfrsf18,tnfaip8l2a,pmaip1,zgc:153993,fas,irf1b,card9,si:dkey-10c21.1,tnfrsf1b,cd40,si:ch73-361p23.3,bcl10,si:dkey-118k5.3
18_Member	GO Biological Processes	GO:0043280	positive regulation of cysteine-type endopeptidase activity involved in apoptotic process	-2.89605	-1.26934	7/39	30590,58022,373114,492763,561021,751765,768248	tp53,casp8,cflara,casp9,casp22,pmaip1,fas
18_Member	GO Biological Processes	GO:2001056	positive regulation of cysteine-type endopeptidase activity	-2.82878	-1.23642	7/40	30590,58022,373114,492763,561021,751765,768248	tp53,casp8,cflara,casp9,casp22,pmaip1,fas
18_Member	GO Biological Processes	GO:0006915	apoptotic process	-2.76916	-1.18586	42/603	30481,30590,58022,58054,58122,266985,325599,327133,334724,335409,373102,373114,373130,404605,406304,406596,449994,492763,541319,553622,553634,560966,561021,562317,566600,566604,568416,568780,569267,571217,723996,751765,767645,768248,792160,796425,100001066,100037357,100270764,100330352,100334750,101882478	gata1a,tp53,casp8,pim2,mcl1a,npm1a,lgals3b,hyou1,anxa1a,socs3a,mcl1b,cflara,dffb,relt,gadd45ba,socs3b,pawr,casp9,crip1,phlda2,casp7,si:ch211-158d24.4,casp22,fadd,si:ch211-284e13.9,casp3b,wt1b,zgc:158343,plekhn1,tnfrsf18,tnfaip8l2a,pmaip1,zgc:153993,fas,irf1b,card9,si:dkey-10c21.1,tnfrsf1b,cd40,si:ch73-361p23.3,bcl10,si:dkey-118k5.3
18_Member	GO Biological Processes	GO:0006919	activation of cysteine-type endopeptidase activity involved in apoptotic process	-2.57908	-1.02348	5/23	58022,373114,492763,561021,751765	casp8,cflara,casp9,casp22,pmaip1
19_Summary	GO Biological Processes	GO:0046456	icosanoid biosynthetic process	-4.11551	-2.16088	6/18	246227,334724,337376,544666,559020,559148,794132,321928,323107,368242,378722,386661,393096,394148,403130,406339,447836,550524,567024,606663,751668	ptgs2a,anxa1a,alox5ap,ptges,ptgs2b,ptgis,si:dkey-17e16.9,phgdh,pgam1a,kmo,rdh10b,scd,lipg,cyp7a1,has1,hk2,pfkma,cbsa,lgsn,psph,gck
19_Member	GO Biological Processes	GO:0046456	icosanoid biosynthetic process	-4.11551	-2.16088	6/18	246227,334724,337376,544666,559020,559148	ptgs2a,anxa1a,alox5ap,ptges,ptgs2b,ptgis
19_Member	GO Biological Processes	GO:0001516	prostaglandin biosynthetic process	-3.84003	-1.98586	5/13	246227,334724,544666,559020,559148	ptgs2a,anxa1a,ptges,ptgs2b,ptgis
19_Member	GO Biological Processes	GO:0046457	prostanoid biosynthetic process	-3.84003	-1.98586	5/13	246227,334724,544666,559020,559148	ptgs2a,anxa1a,ptges,ptgs2b,ptgis
19_Member	GO Biological Processes	GO:0006690	icosanoid metabolic process	-3.82982	-1.98586	7/28	246227,334724,337376,544666,559020,559148,794132	ptgs2a,anxa1a,alox5ap,ptges,ptgs2b,ptgis,si:dkey-17e16.9
19_Member	GO Biological Processes	GO:0006692	prostanoid metabolic process	-3.50349	-1.75469	5/15	246227,334724,544666,559020,559148	ptgs2a,anxa1a,ptges,ptgs2b,ptgis
19_Member	GO Biological Processes	GO:0006693	prostaglandin metabolic process	-3.50349	-1.75469	5/15	246227,334724,544666,559020,559148	ptgs2a,anxa1a,ptges,ptgs2b,ptgis
19_Member	GO Biological Processes	GO:0046394	carboxylic acid biosynthetic process	-3.38191	-1.65356	21/214	246227,321928,323107,334724,337376,368242,378722,386661,393096,394148,403130,406339,447836,544666,550524,559020,559148,567024,606663,751668,794132	ptgs2a,phgdh,pgam1a,anxa1a,alox5ap,kmo,rdh10b,scd,lipg,cyp7a1,has1,hk2,pfkma,ptges,cbsa,ptgs2b,ptgis,lgsn,psph,gck,si:dkey-17e16.9
19_Member	GO Biological Processes	GO:0006636	unsaturated fatty acid biosynthetic process	-3.35447	-1.63354	7/33	246227,334724,386661,544666,559020,559148,794132	ptgs2a,anxa1a,scd,ptges,ptgs2b,ptgis,si:dkey-17e16.9
19_Member	GO Biological Processes	GO:0016053	organic acid biosynthetic process	-3.32803	-1.6168	21/216	246227,321928,323107,334724,337376,368242,378722,386661,393096,394148,403130,406339,447836,544666,550524,559020,559148,567024,606663,751668,794132	ptgs2a,phgdh,pgam1a,anxa1a,alox5ap,kmo,rdh10b,scd,lipg,cyp7a1,has1,hk2,pfkma,ptges,cbsa,ptgs2b,ptgis,lgsn,psph,gck,si:dkey-17e16.9
19_Member	GO Biological Processes	GO:0033559	unsaturated fatty acid metabolic process	-3.11256	-1.44901	7/36	246227,334724,386661,544666,559020,559148,794132	ptgs2a,anxa1a,scd,ptges,ptgs2b,ptgis,si:dkey-17e16.9
19_Member	GO Biological Processes	GO:0072330	monocarboxylic acid biosynthetic process	-2.57507	-1.02281	14/138	246227,323107,334724,378722,386661,393096,394148,406339,447836,544666,559020,559148,751668,794132	ptgs2a,pgam1a,anxa1a,rdh10b,scd,lipg,cyp7a1,hk2,pfkma,ptges,ptgs2b,ptgis,gck,si:dkey-17e16.9
19_Member	GO Biological Processes	GO:1901570	fatty acid derivative biosynthetic process	-2.51213	-0.972976	6/34	246227,334724,337376,544666,559020,559148	ptgs2a,anxa1a,alox5ap,ptges,ptgs2b,ptgis
19_Member	GO Biological Processes	GO:1901568	fatty acid derivative metabolic process	-2.21394	-0.734991	7/51	246227,334724,337376,544666,559020,559148,794132	ptgs2a,anxa1a,alox5ap,ptges,ptgs2b,ptgis,si:dkey-17e16.9
20_Summary	GO Biological Processes	GO:0002432	granuloma formation	-4.09235	-2.16088	3/3	406397,406471,100002946,100033581,100033582	mmp9,tnfrsf1a,cxcl8a,mir21-1,mir21-2
20_Member	GO Biological Processes	GO:0002432	granuloma formation	-4.09235	-2.16088	3/3	406397,406471,100002946	mmp9,tnfrsf1a,cxcl8a
20_Member	GO Biological Processes	GO:0002544	chronic inflammatory response	-4.09235	-2.16088	3/3	406397,406471,100002946	mmp9,tnfrsf1a,cxcl8a
20_Member	GO Biological Processes	GO:0002631	regulation of granuloma formation	-4.09235	-2.16088	3/3	406397,406471,100002946	mmp9,tnfrsf1a,cxcl8a
20_Member	GO Biological Processes	GO:0002676	regulation of chronic inflammatory response	-4.09235	-2.16088	3/3	406397,406471,100002946	mmp9,tnfrsf1a,cxcl8a
20_Member	GO Biological Processes	GO:0033280	response to vitamin D	-2.11247	-0.667317	3/10	100002946,100033581,100033582	cxcl8a,mir21-1,mir21-2

## Sheet: 12hpi_up_KEGG
GroupID	Category	Term	Description	LogP	Log(q-value)	InTerm_InList	Genes	Symbols
1_Summary	KEGG Pathway	dre04210	Apoptosis	-11.183	-8.79118	31/168	30590,58022,58122,195815,321453,335916,337223,368704,373114,373130,394198,402991,406304,406463,406471,406645,450022,492763,497646,541374,550475,553634,554157,558045,562317,566604,751765,767645,768248,100135062,100190951	tp53,casp8,mcl1a,lmna,ctsla,jun,tuba5,ctsc,cflara,dffb,fosab,gadd45ga,gadd45ba,nfkbiaa,tnfrsf1a,ctsba,ctsz,casp9,gadd45bb,capn2a,ctsk,casp7,ctss2.1,parp4,fadd,casp3b,pmaip1,zgc:153993,fas,csf2rb,bcl2l11
1_Member	KEGG Pathway	dre04210	Apoptosis	-11.183	-8.79118	31/168	30590,58022,58122,195815,321453,335916,337223,368704,373114,373130,394198,402991,406304,406463,406471,406645,450022,492763,497646,541374,550475,553634,554157,558045,562317,566604,751765,767645,768248,100135062,100190951	tp53,casp8,mcl1a,lmna,ctsla,jun,tuba5,ctsc,cflara,dffb,fosab,gadd45ga,gadd45ba,nfkbiaa,tnfrsf1a,ctsba,ctsz,casp9,gadd45bb,capn2a,ctsk,casp7,ctss2.1,parp4,fadd,casp3b,pmaip1,zgc:153993,fas,csf2rb,bcl2l11
1_Member	KEGG Pathway	ko04210	Apoptosis	-11.183	-8.79118	31/168	30590,58022,58122,195815,321453,335916,337223,368704,373114,373130,394198,402991,406304,406463,406471,406645,450022,492763,497646,541374,550475,553634,554157,558045,562317,566604,751765,767645,768248,100135062,100190951	tp53,casp8,mcl1a,lmna,ctsla,jun,tuba5,ctsc,cflara,dffb,fosab,gadd45ga,gadd45ba,nfkbiaa,tnfrsf1a,ctsba,ctsz,casp9,gadd45bb,capn2a,ctsk,casp7,ctss2.1,parp4,fadd,casp3b,pmaip1,zgc:153993,fas,csf2rb,bcl2l11
2_Summary	KEGG Pathway	dre04060	Cytokine-cytokine receptor interaction	-10.6378	-8.54704	31/176	140747,359834,404605,405770,406471,445410,497629,553181,553366,553957,562247,563884,570404,571217,678622,768248,791973,797527,799475,100002946,100003859,100006778,100037357,100134976,100135062,100135755,100150233,100188894,100270764,100333821,100885851,368614,368615	cxcr4a,tgfb1a,relt,il1b,tnfrsf1a,il12a,kitb,kitlgb,ccr9a,il10,clcf1,tgfb1b,il11a,tnfrsf18,tnfrsf9a,fas,cxcr3.2,crfb4,il13ra1,cxcl8a,cxcl8b.3,il6st,tnfrsf1b,il21r.1,csf2rb,il6r,lepa,il4,cd40,tnfrsf11a,il6,si:busm1-48c11.3,mhc2b
2_Member	KEGG Pathway	dre04060	Cytokine-cytokine receptor interaction	-10.6378	-8.54704	31/176	140747,359834,404605,405770,406471,445410,497629,553181,553366,553957,562247,563884,570404,571217,678622,768248,791973,797527,799475,100002946,100003859,100006778,100037357,100134976,100135062,100135755,100150233,100188894,100270764,100333821,100885851	cxcr4a,tgfb1a,relt,il1b,tnfrsf1a,il12a,kitb,kitlgb,ccr9a,il10,clcf1,tgfb1b,il11a,tnfrsf18,tnfrsf9a,fas,cxcr3.2,crfb4,il13ra1,cxcl8a,cxcl8b.3,il6st,tnfrsf1b,il21r.1,csf2rb,il6r,lepa,il4,cd40,tnfrsf11a,il6
2_Member	KEGG Pathway	ko04060	Cytokine-cytokine receptor interaction	-10.6378	-8.54704	31/176	140747,359834,404605,405770,406471,445410,497629,553181,553366,553957,562247,563884,570404,571217,678622,768248,791973,797527,799475,100002946,100003859,100006778,100037357,100134976,100135062,100135755,100150233,100188894,100270764,100333821,100885851	cxcr4a,tgfb1a,relt,il1b,tnfrsf1a,il12a,kitb,kitlgb,ccr9a,il10,clcf1,tgfb1b,il11a,tnfrsf18,tnfrsf9a,fas,cxcr3.2,crfb4,il13ra1,cxcl8a,cxcl8b.3,il6st,tnfrsf1b,il21r.1,csf2rb,il6r,lepa,il4,cd40,tnfrsf11a,il6
2_Member	KEGG Pathway	dre04672	Intestinal immune network for IgA production	-5.24566	-3.69894	10/40	140747,359834,368614,368615,553366,553957,563884,100188894,100270764,100885851	cxcr4a,tgfb1a,si:busm1-48c11.3,mhc2b,ccr9a,il10,tgfb1b,il4,cd40,il6
2_Member	KEGG Pathway	ko04672	Intestinal immune network for IgA production	-5.24566	-3.69894	10/40	140747,359834,368614,368615,553366,553957,563884,100188894,100270764,100885851	cxcr4a,tgfb1a,si:busm1-48c11.3,mhc2b,ccr9a,il10,tgfb1b,il4,cd40,il6
3_Summary	KEGG Pathway	dre04115	p53 signaling pathway	-7.80713	-5.89243	17/75	30590,58022,324137,402991,403079,406304,492763,497646,558619,566604,751765,767645,768248,100136840,100149048,100149745,100151416	tp53,casp8,cd82b,gadd45ga,igfbp3,gadd45ba,casp9,gadd45bb,si:dkey-42i9.6,casp3b,pmaip1,zgc:153993,fas,serpine1,si:zfos-80g12.1,sesn2,cdkn1a
3_Member	KEGG Pathway	dre04115	p53 signaling pathway	-7.80713	-5.89243	17/75	30590,58022,324137,402991,403079,406304,492763,497646,558619,566604,751765,767645,768248,100136840,100149048,100149745,100151416	tp53,casp8,cd82b,gadd45ga,igfbp3,gadd45ba,casp9,gadd45bb,si:dkey-42i9.6,casp3b,pmaip1,zgc:153993,fas,serpine1,si:zfos-80g12.1,sesn2,cdkn1a
3_Member	KEGG Pathway	ko04115	p53 signaling pathway	-7.80713	-5.89243	17/75	30590,58022,324137,402991,403079,406304,492763,497646,558619,566604,751765,767645,768248,100136840,100149048,100149745,100151416	tp53,casp8,cd82b,gadd45ga,igfbp3,gadd45ba,casp9,gadd45bb,si:dkey-42i9.6,casp3b,pmaip1,zgc:153993,fas,serpine1,si:zfos-80g12.1,sesn2,cdkn1a
4_Summary	KEGG Pathway	dre04621	NOD-like receptor signaling pathway	-7.30716	-5.51741	24/154	30280,58022,335916,393386,393551,403013,405770,406463,406645,431715,436615,436734,557239,557810,562317,563907,564854,570622,641582,796425,100002946,100003859,100004555,100885851,394198,403127,403138,403139,445410,550475,100270764,335474,336504,336933,100007897	jak1,casp8,jun,cybb,cyba,irf9,il1b,nfkbiaa,ctsba,rbck1,gbp1,txn,antxr2a,mapk12b,fadd,antxr1c,irf3,gbp2,pstpip1b,card9,cxcl8a,cxcl8b.3,ripk3,il6,fosab,tlr1,tlr5a,tlr5b,il12a,ctsk,cd40,arpc1b,arpc5a,rhogb,pkn1b
4_Member	KEGG Pathway	dre04621	NOD-like receptor signaling pathway	-7.30716	-5.51741	24/154	30280,58022,335916,393386,393551,403013,405770,406463,406645,431715,436615,436734,557239,557810,562317,563907,564854,570622,641582,796425,100002946,100003859,100004555,100885851	jak1,casp8,jun,cybb,cyba,irf9,il1b,nfkbiaa,ctsba,rbck1,gbp1,txn,antxr2a,mapk12b,fadd,antxr1c,irf3,gbp2,pstpip1b,card9,cxcl8a,cxcl8b.3,ripk3,il6
4_Member	KEGG Pathway	ko04621	NOD-like receptor signaling pathway	-7.30716	-5.51741	24/154	30280,58022,335916,393386,393551,403013,405770,406463,406645,431715,436615,436734,557239,557810,562317,563907,564854,570622,641582,796425,100002946,100003859,100004555,100885851	jak1,casp8,jun,cybb,cyba,irf9,il1b,nfkbiaa,ctsba,rbck1,gbp1,txn,antxr2a,mapk12b,fadd,antxr1c,irf3,gbp2,pstpip1b,card9,cxcl8a,cxcl8b.3,ripk3,il6
4_Member	KEGG Pathway	dre04620	Toll-like receptor signaling pathway	-6.09001	-4.39716	17/97	58022,335916,394198,403127,403138,403139,405770,406463,445410,550475,557810,562317,564854,100002946,100003859,100270764,100885851	casp8,jun,fosab,tlr1,tlr5a,tlr5b,il1b,nfkbiaa,il12a,ctsk,mapk12b,fadd,irf3,cxcl8a,cxcl8b.3,cd40,il6
4_Member	KEGG Pathway	ko04620	Toll-like receptor signaling pathway	-6.09001	-4.39716	17/97	58022,335916,394198,403127,403138,403139,405770,406463,445410,550475,557810,562317,564854,100002946,100003859,100270764,100885851	casp8,jun,fosab,tlr1,tlr5a,tlr5b,il1b,nfkbiaa,il12a,ctsk,mapk12b,fadd,irf3,cxcl8a,cxcl8b.3,cd40,il6
4_Member	KEGG Pathway	dre05132	Salmonella infection	-3.56001	-2.1682	13/97	335474,335916,336504,336933,394198,403138,403139,405770,557810,100002946,100003859,100007897,100885851	arpc1b,jun,arpc5a,rhogb,fosab,tlr5a,tlr5b,il1b,mapk12b,cxcl8a,cxcl8b.3,pkn1b,il6
4_Member	KEGG Pathway	ko05132	Salmonella infection	-3.56001	-2.1682	13/97	335474,335916,336504,336933,394198,403138,403139,405770,557810,100002946,100003859,100007897,100885851	arpc1b,jun,arpc5a,rhogb,fosab,tlr5a,tlr5b,il1b,mapk12b,cxcl8a,cxcl8b.3,pkn1b,il6
4_Member	KEGG Pathway	dre04622	RIG-I-like receptor signaling pathway	-2.29312	-0.980482	8/62	58022,406463,445410,557810,562317,564854,100002946,100003859	casp8,nfkbiaa,il12a,mapk12b,fadd,irf3,cxcl8a,cxcl8b.3
4_Member	KEGG Pathway	ko04622	RIG-I-like receptor signaling pathway	-2.29312	-0.980482	8/62	58022,406463,445410,557810,562317,564854,100002946,100003859	casp8,nfkbiaa,il12a,mapk12b,fadd,irf3,cxcl8a,cxcl8b.3
5_Summary	KEGG Pathway	dre04145	Phagosome	-5.41286	-3.7992	21/156	321046,321453,337223,368614,368615,368771,378966,386787,393386,393551,403014,406342,450017,494477,550458,554157,558552,559502,562473,571584,100536533	c3a.1,ctsla,tuba5,si:busm1-48c11.3,mhc2b,tap2a,ncf1,itga5,cybb,cyba,ncf4,tcirg1b,atp6v0e1,tfr1a,tubb6,ctss2.1,tubb1,mrc1b,ncf2,marco,itga2.2
5_Member	KEGG Pathway	dre04145	Phagosome	-5.41286	-3.7992	21/156	321046,321453,337223,368614,368615,368771,378966,386787,393386,393551,403014,406342,450017,494477,550458,554157,558552,559502,562473,571584,100536533	c3a.1,ctsla,tuba5,si:busm1-48c11.3,mhc2b,tap2a,ncf1,itga5,cybb,cyba,ncf4,tcirg1b,atp6v0e1,tfr1a,tubb6,ctss2.1,tubb1,mrc1b,ncf2,marco,itga2.2
5_Member	KEGG Pathway	ko04145	Phagosome	-5.41286	-3.7992	21/156	321046,321453,337223,368614,368615,368771,378966,386787,393386,393551,403014,406342,450017,494477,550458,554157,558552,559502,562473,571584,100536533	c3a.1,ctsla,tuba5,si:busm1-48c11.3,mhc2b,tap2a,ncf1,itga5,cybb,cyba,ncf4,tcirg1b,atp6v0e1,tfr1a,tubb6,ctss2.1,tubb1,mrc1b,ncf2,marco,itga2.2
6_Summary	KEGG Pathway	dre05168	Herpes simplex virus 1 infection	-4.2708	-2.78207	21/185	30280,30590,58022,321046,335916,368614,368615,368771,394198,403013,405770,406463,406471,406596,445410,503703,562317,564854,566604,768248,100885851	jak1,tp53,casp8,c3a.1,jun,si:busm1-48c11.3,mhc2b,tap2a,fosab,irf9,il1b,nfkbiaa,tnfrsf1a,socs3b,il12a,pkz,fadd,irf3,casp3b,fas,il6
6_Member	KEGG Pathway	dre05168	Herpes simplex virus 1 infection	-4.2708	-2.78207	21/185	30280,30590,58022,321046,335916,368614,368615,368771,394198,403013,405770,406463,406471,406596,445410,503703,562317,564854,566604,768248,100885851	jak1,tp53,casp8,c3a.1,jun,si:busm1-48c11.3,mhc2b,tap2a,fosab,irf9,il1b,nfkbiaa,tnfrsf1a,socs3b,il12a,pkz,fadd,irf3,casp3b,fas,il6
6_Member	KEGG Pathway	ko05168	Herpes simplex infection	-4.2708	-2.78207	21/185	30280,30590,58022,321046,335916,368614,368615,368771,394198,403013,405770,406463,406471,406596,445410,503703,562317,564854,566604,768248,100885851	jak1,tp53,casp8,c3a.1,jun,si:busm1-48c11.3,mhc2b,tap2a,fosab,irf9,il1b,nfkbiaa,tnfrsf1a,socs3b,il12a,pkz,fadd,irf3,casp3b,fas,il6
7_Summary	KEGG Pathway	dre04933	AGE-RAGE signaling pathway in diabetic complications	-4.08829	-2.65072	16/123	30767,58054,335916,359834,393386,405770,557810,563884,566604,567257,767645,100002946,100003859,100136840,100885851,108180329	stat3,pim2,jun,tgfb1a,cybb,il1b,mapk12b,tgfb1b,casp3b,f3a,zgc:153993,cxcl8a,cxcl8b.3,serpine1,il6,thbd
7_Member	KEGG Pathway	dre04933	AGE-RAGE signaling pathway in diabetic complications	-4.08829	-2.65072	16/123	30767,58054,335916,359834,393386,405770,557810,563884,566604,567257,767645,100002946,100003859,100136840,100885851,108180329	stat3,pim2,jun,tgfb1a,cybb,il1b,mapk12b,tgfb1b,casp3b,f3a,zgc:153993,cxcl8a,cxcl8b.3,serpine1,il6,thbd
7_Member	KEGG Pathway	ko04933	AGE-RAGE signaling pathway in diabetic complications	-4.08829	-2.65072	16/123	30767,58054,335916,359834,393386,405770,557810,563884,566604,567257,767645,100002946,100003859,100136840,100885851,108180329	stat3,pim2,jun,tgfb1a,cybb,il1b,mapk12b,tgfb1b,casp3b,f3a,zgc:153993,cxcl8a,cxcl8b.3,serpine1,il6,thbd
8_Summary	KEGG Pathway	dre04216	Ferroptosis	-3.20867	-1.85824	8/45	30255,30590,334561,393386,431716,436651,494477,791518	tfa,tp53,acsl4b,cybb,sat1a.2,fthl27,tfr1a,hmox1a
8_Member	KEGG Pathway	dre04216	Ferroptosis	-3.20867	-1.85824	8/45	30255,30590,334561,393386,431716,436651,494477,791518	tfa,tp53,acsl4b,cybb,sat1a.2,fthl27,tfr1a,hmox1a
8_Member	KEGG Pathway	ko04216	Ferroptosis	-3.20867	-1.85824	8/45	30255,30590,334561,393386,431716,436651,494477,791518	tfa,tp53,acsl4b,cybb,sat1a.2,fthl27,tfr1a,hmox1a
9_Summary	KEGG Pathway	dre04920	Adipocytokine signaling pathway	-2.2269	-0.968246	10/91	30464,30767,334561,406463,406471,406473,406596,100037357,100150233,100321338	rxrga,stat3,acsl4b,nfkbiaa,tnfrsf1a,pck2,socs3b,tnfrsf1b,lepa,slc2a1b
9_Member	KEGG Pathway	dre04920	Adipocytokine signaling pathway	-2.2269	-0.968246	10/91	30464,30767,334561,406463,406471,406473,406596,100037357,100150233,100321338	rxrga,stat3,acsl4b,nfkbiaa,tnfrsf1a,pck2,socs3b,tnfrsf1b,lepa,slc2a1b
9_Member	KEGG Pathway	ko04920	Adipocytokine signaling pathway	-2.2269	-0.968246	10/91	30464,30767,334561,406463,406471,406473,406596,100037357,100150233,100321338	rxrga,stat3,acsl4b,nfkbiaa,tnfrsf1a,pck2,socs3b,tnfrsf1b,lepa,slc2a1b
10_Summary	KEGG Pathway	dre00590	Arachidonic acid metabolism	-2.21394	-0.968246	7/51	246227,393387,544666,559020,559148,797309,100148818	ptgs2a,ggt1a,ptges,ptgs2b,ptgis,cyp2j20,si:ch73-55i23.1
10_Member	KEGG Pathway	dre00590	Arachidonic acid metabolism	-2.21394	-0.968246	7/51	246227,393387,544666,559020,559148,797309,100148818	ptgs2a,ggt1a,ptges,ptgs2b,ptgis,cyp2j20,si:ch73-55i23.1
10_Member	KEGG Pathway	ko00590	Arachidonic acid metabolism	-2.21394	-0.968246	7/51	246227,393387,544666,559020,559148,797309,100148818	ptgs2a,ggt1a,ptges,ptgs2b,ptgis,cyp2j20,si:ch73-55i23.1

## Sheet: 12hpi_up_Reactome
GroupID	Category	Term	Description	LogP	Log(q-value)	InTerm_InList	Genes	Symbols
1_Summary	Reactome Gene Sets	R-DRE-168249	Innate Immune System	-11.0478	-7.85379	58/502	30216,30647,30648,30665,30666,30671,323107,335916,336933,373081,393342,393551,394108,394198,402979,403014,406276,406549,406645,436816,445037,447944,492763,504174,541383,554157,557810,560548,562473,564076,564517,564854,565637,566658,568653,568904,570832,678516,791890,792182,792196,795785,796425,100000085,100000959,100002627,100002946,100003911,100005593,100126123,100319064,100320176,100333601,1003…	hbba1,psme2,psme1,psmb9a,psmb8a,hsp70.3,pgam1a,jun,rhogb,mvp,zgc:64051,cyba,stk10,fosab,cdab,ncf4,s100a10b,ckap4,ctsba,psmb10,hbba2,fabp4a,casp9,ba1l,ms4a17a.9,ctss2.1,mapk12b,si:ch211-15b10.6,ncf2,unc13d,gab2,irf3,fgl2a,tcnbb,btk,eef2a.2,c7b,tnfaip6,rnaset2,eef2a.1,dnase1l1,cxcl18b,card9,si:ch211-212k18.7,c5ar1,ptafr,cxcl8a,cxcl19,adam8b,hsp70.1,si:ch211-264f5.6,si:ch73-343l4.8,mmp25b,icam3,cxcl…
1_Member	Reactome Gene Sets	R-DRE-168249	Innate Immune System	-11.0478	-7.85379	58/502	30216,30647,30648,30665,30666,30671,323107,335916,336933,373081,393342,393551,394108,394198,402979,403014,406276,406549,406645,436816,445037,447944,492763,504174,541383,554157,557810,560548,562473,564076,564517,564854,565637,566658,568653,568904,570832,678516,791890,792182,792196,795785,796425,100000085,100000959,100002627,100002946,100003911,100005593,100126123,100319064,100320176,100333601,1003…	hbba1,psme2,psme1,psmb9a,psmb8a,hsp70.3,pgam1a,jun,rhogb,mvp,zgc:64051,cyba,stk10,fosab,cdab,ncf4,s100a10b,ckap4,ctsba,psmb10,hbba2,fabp4a,casp9,ba1l,ms4a17a.9,ctss2.1,mapk12b,si:ch211-15b10.6,ncf2,unc13d,gab2,irf3,fgl2a,tcnbb,btk,eef2a.2,c7b,tnfaip6,rnaset2,eef2a.1,dnase1l1,cxcl18b,card9,si:ch211-212k18.7,c5ar1,ptafr,cxcl8a,cxcl19,adam8b,hsp70.1,si:ch211-264f5.6,si:ch73-343l4.8,mmp25b,icam3,cxcl…
1_Member	Reactome Gene Sets	R-DRE-6798695	Neutrophil degranulation	-8.73411	-5.84118	40/321	30216,30671,323107,336933,373081,393342,393551,394108,402979,406276,406549,406645,445037,447944,504174,541383,554157,564076,565637,566658,568904,678516,791890,792182,792196,795785,100000085,100000959,100002627,100002946,100003911,100005593,100126123,100319064,100320176,100333601,100536594,101886098,101887140,101887158	hbba1,hsp70.3,pgam1a,rhogb,mvp,zgc:64051,cyba,stk10,cdab,s100a10b,ckap4,ctsba,hbba2,fabp4a,ba1l,ms4a17a.9,ctss2.1,unc13d,fgl2a,tcnbb,eef2a.2,tnfaip6,rnaset2,eef2a.1,dnase1l1,cxcl18b,si:ch211-212k18.7,c5ar1,ptafr,cxcl8a,cxcl19,adam8b,hsp70.1,si:ch211-264f5.6,si:ch73-343l4.8,mmp25b,cxcl8b.1,LOC101886098,tbc1d10c,tmem176l.3a
2_Summary	Reactome Gene Sets	R-DRE-6783589	Interleukin-6 family signaling	-7.10408	-4.38725	7/11	30767,406596,436923,562247,565104,100006778,100885851	stat3,socs3b,crlf1a,clcf1,lifrb,il6st,il6
2_Member	Reactome Gene Sets	R-DRE-6783589	Interleukin-6 family signaling	-7.10408	-4.38725	7/11	30767,406596,436923,562247,565104,100006778,100885851	stat3,socs3b,crlf1a,clcf1,lifrb,il6st,il6
2_Member	Reactome Gene Sets	R-DRE-1059683	Interleukin-6 signaling	-4.77378	-2.35797	4/5	30767,406596,100006778,100885851	stat3,socs3b,il6st,il6
2_Member	Reactome Gene Sets	R-DRE-6788467	IL-6-type cytokine receptor ligand interactions	-3.67321	-1.4335	4/8	436923,562247,565104,100006778	crlf1a,clcf1,lifrb,il6st
3_Summary	Reactome Gene Sets	R-DRE-1280215	Cytokine Signaling in Immune system	-6.84692	-4.25502	37/332	30647,30648,30665,30666,30767,335916,394198,403013,406276,406596,436816,436923,493181,557258,557810,560193,560966,561370,562247,564517,564854,565104,570618,571217,571368,795096,797938,100006778,100037357,100134976,100192216,100270759,100270764,100331628,100333821,100885851,101885596	psme2,psme1,psmb9a,psmb8a,stat3,jun,fosab,irf9,s100a10b,socs3b,psmb10,crlf1a,fgf7,ptk2ba,mapk12b,il34,si:ch211-158d24.4,jak3,clcf1,gab2,irf3,lifrb,hist2h3c,tnfrsf18,ifngr1,ifit16,hbegfa,il6st,tnfrsf1b,il21r.1,il15ra,csf3a,cd40,tnfsf11,tnfrsf11a,il6,hck
3_Member	Reactome Gene Sets	R-DRE-1280215	Cytokine Signaling in Immune system	-6.84692	-4.25502	37/332	30647,30648,30665,30666,30767,335916,394198,403013,406276,406596,436816,436923,493181,557258,557810,560193,560966,561370,562247,564517,564854,565104,570618,571217,571368,795096,797938,100006778,100037357,100134976,100192216,100270759,100270764,100331628,100333821,100885851,101885596	psme2,psme1,psmb9a,psmb8a,stat3,jun,fosab,irf9,s100a10b,socs3b,psmb10,crlf1a,fgf7,ptk2ba,mapk12b,il34,si:ch211-158d24.4,jak3,clcf1,gab2,irf3,lifrb,hist2h3c,tnfrsf18,ifngr1,ifit16,hbegfa,il6st,tnfrsf1b,il21r.1,il15ra,csf3a,cd40,tnfsf11,tnfrsf11a,il6,hck
3_Member	Reactome Gene Sets	R-DRE-449147	Signaling by Interleukins	-6.27027	-3.77528	20/127	30767,335916,394198,406276,406596,436923,557258,560193,561370,562247,564517,565104,570618,571368,100006778,100134976,100192216,100270759,100885851,101885596	stat3,jun,fosab,s100a10b,socs3b,crlf1a,ptk2ba,il34,jak3,clcf1,gab2,lifrb,hist2h3c,ifngr1,il6st,il21r.1,il15ra,csf3a,il6,hck
4_Summary	Reactome Gene Sets	R-DRE-5668541	TNFR2 non-canonical NF-kB pathway	-4.33808	-1.98922	11/60	30647,30648,30665,30666,436816,560966,571217,100037357,100270764,100331628,100333821,393551,403014,556826,562473,101886098,30671,368243,100126123,30590,100151416,30744,386763,335865,335916,394198,497283,541344,550458,555766,558552,570618,100149745,114426,558275,327060,30481,566787	psme2,psme1,psmb9a,psmb8a,psmb10,si:ch211-158d24.4,tnfrsf18,tnfrsf1b,cd40,tnfsf11,tnfrsf11a,cyba,ncf4,tap2t,ncf2,LOC101886098,hsp70.3,hspb1,hsp70.1,tp53,cdkn1a,cbfb,tead3a,hspa4a,jun,fosab,hif1al2,prdx1,tubb6,etsrp,tubb1,hist2h3c,sesn2,odc1,cdc42ep5,wee1,gata1a,cdt1
4_Member	Reactome Gene Sets	R-DRE-5668541	TNFR2 non-canonical NF-kB pathway	-4.33808	-1.98922	11/60	30647,30648,30665,30666,436816,560966,571217,100037357,100270764,100331628,100333821	psme2,psme1,psmb9a,psmb8a,psmb10,si:ch211-158d24.4,tnfrsf18,tnfrsf1b,cd40,tnfsf11,tnfrsf11a
4_Member	Reactome Gene Sets	R-DRE-1236975	Antigen processing-Cross presentation	-3.51614	-1.3898	10/62	30647,30648,30665,30666,393551,403014,436816,556826,562473,101886098	psme2,psme1,psmb9a,psmb8a,cyba,ncf4,psmb10,tap2t,ncf2,LOC101886098
4_Member	Reactome Gene Sets	R-DRE-450408	AUF1 (hnRNP D0) binds and destabilizes mRNA	-3.42052	-1.37269	8/42	30647,30648,30665,30666,30671,368243,436816,100126123	psme2,psme1,psmb9a,psmb8a,hsp70.3,hspb1,psmb10,hsp70.1
4_Member	Reactome Gene Sets	R-DRE-8852276	The role of GTSE1 in G2/M progression after G2 checkpoint	-2.89605	-0.980846	7/39	30590,30647,30648,30665,30666,436816,100151416	tp53,psme2,psme1,psmb9a,psmb8a,psmb10,cdkn1a
4_Member	Reactome Gene Sets	R-DRE-8878159	Transcriptional regulation by RUNX3	-2.67359	-0.826237	8/54	30590,30647,30648,30665,30666,30744,386763,436816	tp53,psme2,psme1,psmb9a,psmb8a,cbfb,tead3a,psmb10
4_Member	Reactome Gene Sets	R-DRE-2262752	Cellular responses to stress	-2.64234	-0.826237	22/261	30590,30647,30648,30665,30666,30671,335865,335916,393551,394198,403014,436816,497283,541344,550458,555766,558552,562473,570618,100126123,100149745,100151416	tp53,psme2,psme1,psmb9a,psmb8a,hsp70.3,hspa4a,jun,cyba,fosab,ncf4,psmb10,hif1al2,prdx1,tubb6,etsrp,tubb1,ncf2,hist2h3c,hsp70.1,sesn2,cdkn1a
4_Member	Reactome Gene Sets	R-DRE-8953897	Cellular responses to external stimuli	-2.62178	-0.826237	22/262	30590,30647,30648,30665,30666,30671,335865,335916,393551,394198,403014,436816,497283,541344,550458,555766,558552,562473,570618,100126123,100149745,100151416	tp53,psme2,psme1,psmb9a,psmb8a,hsp70.3,hspa4a,jun,cyba,fosab,ncf4,psmb10,hif1al2,prdx1,tubb6,etsrp,tubb1,ncf2,hist2h3c,hsp70.1,sesn2,cdkn1a
4_Member	Reactome Gene Sets	R-DRE-69563	p53-Dependent G1 DNA Damage Response	-2.52366	-0.77686	7/45	30590,30647,30648,30665,30666,436816,100151416	tp53,psme2,psme1,psmb9a,psmb8a,psmb10,cdkn1a
4_Member	Reactome Gene Sets	R-DRE-69580	p53-Dependent G1/S DNA damage checkpoint	-2.52366	-0.77686	7/45	30590,30647,30648,30665,30666,436816,100151416	tp53,psme2,psme1,psmb9a,psmb8a,psmb10,cdkn1a
4_Member	Reactome Gene Sets	R-DRE-69615	G1/S DNA Damage Checkpoints	-2.41432	-0.697487	7/47	30590,30647,30648,30665,30666,436816,100151416	tp53,psme2,psme1,psmb9a,psmb8a,psmb10,cdkn1a
4_Member	Reactome Gene Sets	R-DRE-450531	Regulation of mRNA stability by proteins that bind AU-rich elements	-2.38139	-0.692796	8/60	30647,30648,30665,30666,30671,368243,436816,100126123	psme2,psme1,psmb9a,psmb8a,hsp70.3,hspb1,psmb10,hsp70.1
4_Member	Reactome Gene Sets	R-DRE-8941858	Regulation of RUNX3 expression and activity	-2.32213	-0.692796	6/37	30647,30648,30665,30666,30744,436816	psme2,psme1,psmb9a,psmb8a,cbfb,psmb10
4_Member	Reactome Gene Sets	R-DRE-1236978	Cross-presentation of soluble exogenous antigens (endosomes)	-2.26337	-0.692796	6/38	30647,30648,30665,30666,436816,101886098	psme2,psme1,psmb9a,psmb8a,psmb10,LOC101886098
4_Member	Reactome Gene Sets	R-DRE-349425	Autodegradation of the E3 ubiquitin ligase COP1	-2.26337	-0.692796	6/38	30590,30647,30648,30665,30666,436816	tp53,psme2,psme1,psmb9a,psmb8a,psmb10
4_Member	Reactome Gene Sets	R-DRE-350562	Regulation of ornithine decarboxylase (ODC)	-2.20667	-0.665922	6/39	30647,30648,30665,30666,114426,436816	psme2,psme1,psmb9a,psmb8a,odc1,psmb10
4_Member	Reactome Gene Sets	R-DRE-69541	Stabilization of p53	-2.20667	-0.665922	6/39	30590,30647,30648,30665,30666,436816	tp53,psme2,psme1,psmb9a,psmb8a,psmb10
4_Member	Reactome Gene Sets	R-DRE-5687128	MAPK6/MAPK4 signaling	-2.12186	-0.608711	7/53	30647,30648,30665,30666,368243,436816,558275	psme2,psme1,psmb9a,psmb8a,hspb1,psmb10,cdc42ep5
4_Member	Reactome Gene Sets	R-DRE-69202	Cyclin E associated events during G1/S transition	-2.07767	-0.591278	7/54	30647,30648,30665,30666,327060,436816,100151416	psme2,psme1,psmb9a,psmb8a,wee1,psmb10,cdkn1a
4_Member	Reactome Gene Sets	R-DRE-8939236	RUNX1 regulates transcription of genes involved in differentiation of HSCs	-2.07767	-0.591278	7/54	30481,30647,30648,30665,30666,30744,436816	gata1a,psme2,psme1,psmb9a,psmb8a,cbfb,psmb10
4_Member	Reactome Gene Sets	R-DRE-68827	CDT1 association with the CDC6:ORC:origin complex	-2.04789	-0.56993	6/42	30647,30648,30665,30666,436816,566787	psme2,psme1,psmb9a,psmb8a,psmb10,cdt1
4_Member	Reactome Gene Sets	R-DRE-69656	Cyclin A:Cdk2-associated events at S phase entry	-2.03463	-0.564947	7/55	30647,30648,30665,30666,327060,436816,100151416	psme2,psme1,psmb9a,psmb8a,wee1,psmb10,cdkn1a
5_Summary	Reactome Gene Sets	R-DRE-451927	Interleukin-2 family signaling	-3.82808	-1.53721	6/20	30767,557258,561370,564517,100134976,100192216,565104,570618,571368	stat3,ptk2ba,jak3,gab2,il21r.1,il15ra,lifrb,hist2h3c,ifngr1
5_Member	Reactome Gene Sets	R-DRE-451927	Interleukin-2 family signaling	-3.82808	-1.53721	6/20	30767,557258,561370,564517,100134976,100192216	stat3,ptk2ba,jak3,gab2,il21r.1,il15ra
5_Member	Reactome Gene Sets	R-DRE-6785807	Interleukin-4 and Interleukin-13 signaling	-3.22635	-1.23651	4/10	30767,561370,565104,100134976	stat3,jak3,lifrb,il21r.1
5_Member	Reactome Gene Sets	R-DRE-9020958	Interleukin-21 signaling	-2.60522	-0.826237	3/7	30767,561370,100134976	stat3,jak3,il21r.1
5_Member	Reactome Gene Sets	R-DRE-1266695	Interleukin-7 signaling	-2.27717	-0.692796	4/17	30767,561370,565104,570618	stat3,jak3,lifrb,hist2h3c
5_Member	Reactome Gene Sets	R-DRE-8854691	Interleukin-20 family signaling	-2.11247	-0.608711	3/10	30767,561370,571368	stat3,jak3,ifngr1
6_Summary	Reactome Gene Sets	R-DRE-380108	Chemokine receptors bind chemokines	-3.53249	-1.3898	7/31	553366,794891,795785,100002946,100003911,100331911,100536594,30211,334724,402857,556770,793458,795679,100000959,100002627,100320280,100329613,100329657,100333265,337838,556502	ccr9a,ccl19a.1,cxcl18b,cxcl8a,cxcl19,ccl34b.8,cxcl8b.1,pyya,anxa1a,s1pr4,gpr183a,pyyb,si:dkey-42l23.2,c5ar1,ptafr,tac3a,hcar1-4,ltb4r,LOC100333265,gng5,adma
6_Member	Reactome Gene Sets	R-DRE-380108	Chemokine receptors bind chemokines	-3.53249	-1.3898	7/31	553366,794891,795785,100002946,100003911,100331911,100536594	ccr9a,ccl19a.1,cxcl18b,cxcl8a,cxcl19,ccl34b.8,cxcl8b.1
6_Member	Reactome Gene Sets	R-DRE-373076	Class A/1 (Rhodopsin-like receptors)	-3.24392	-1.23651	19/189	30211,334724,402857,553366,556770,793458,794891,795679,795785,100000959,100002627,100002946,100003911,100320280,100329613,100329657,100331911,100333265,100536594	pyya,anxa1a,s1pr4,ccr9a,gpr183a,pyyb,ccl19a.1,si:dkey-42l23.2,cxcl18b,c5ar1,ptafr,cxcl8a,cxcl19,tac3a,hcar1-4,ltb4r,ccl34b.8,LOC100333265,cxcl8b.1
6_Member	Reactome Gene Sets	R-DRE-375276	Peptide ligand-binding receptors	-3.10386	-1.14035	13/108	30211,334724,553366,793458,794891,795785,100000959,100002946,100003911,100320280,100331911,100333265,100536594	pyya,anxa1a,ccr9a,pyyb,ccl19a.1,cxcl18b,c5ar1,cxcl8a,cxcl19,tac3a,ccl34b.8,LOC100333265,cxcl8b.1
6_Member	Reactome Gene Sets	R-DRE-500792	GPCR ligand binding	-2.99781	-1.05912	21/229	30211,334724,337838,402857,553366,556502,556770,793458,794891,795679,795785,100000959,100002627,100002946,100003911,100320280,100329613,100329657,100331911,100333265,100536594	pyya,anxa1a,gng5,s1pr4,ccr9a,adma,gpr183a,pyyb,ccl19a.1,si:dkey-42l23.2,cxcl18b,c5ar1,ptafr,cxcl8a,cxcl19,tac3a,hcar1-4,ltb4r,ccl34b.8,LOC100333265,cxcl8b.1
7_Summary	Reactome Gene Sets	R-DRE-1236973	Cross-presentation of particulate exogenous antigens (phagosomes)	-3.50457	-1.3898	3/4	393551,403014,562473,541344,406276	cyba,ncf4,ncf2,prdx1,s100a10b
7_Member	Reactome Gene Sets	R-DRE-1236973	Cross-presentation of particulate exogenous antigens (phagosomes)	-3.50457	-1.3898	3/4	393551,403014,562473	cyba,ncf4,ncf2
7_Member	Reactome Gene Sets	R-DRE-3299685	Detoxification of Reactive Oxygen Species	-2.37872	-0.692796	4/16	393551,403014,541344,562473	cyba,ncf4,prdx1,ncf2
7_Member	Reactome Gene Sets	R-DRE-5668599	RHO GTPases Activate NADPH Oxidases	-2.27717	-0.692796	4/17	393551,403014,406276,562473	cyba,ncf4,s100a10b,ncf2
8_Summary	Reactome Gene Sets	R-DRE-5669034	TNFs bind their physiological receptors	-3.43308	-1.37269	4/9	560966,571217,100037357,100331628	si:ch211-158d24.4,tnfrsf18,tnfrsf1b,tnfsf11
8_Member	Reactome Gene Sets	R-DRE-5669034	TNFs bind their physiological receptors	-3.43308	-1.37269	4/9	560966,571217,100037357,100331628	si:ch211-158d24.4,tnfrsf18,tnfrsf1b,tnfsf11
9_Summary	Reactome Gene Sets	R-DRE-198933	Immunoregulatory interactions between a Lymphoid and a non-Lymphoid cell	-2.66998	-0.826237	5/22	100270764,100331505,100331628,100334824,101886098,100333821	cd40,si:cabz01074946.1,tnfsf11,icam3,LOC101886098,tnfrsf11a
9_Member	Reactome Gene Sets	R-DRE-198933	Immunoregulatory interactions between a Lymphoid and a non-Lymphoid cell	-2.66998	-0.826237	5/22	100270764,100331505,100331628,100334824,101886098	cd40,si:cabz01074946.1,tnfsf11,icam3,LOC101886098
9_Member	Reactome Gene Sets	R-DRE-5676594	TNF receptor superfamily (TNFSF) members mediating non-canonical NF-kB pathway	-2.41526	-0.697487	3/8	100270764,100331628,100333821	cd40,tnfsf11,tnfrsf11a
10_Summary	Reactome Gene Sets	R-DRE-909733	Interferon alpha/beta signaling	-2.60522	-0.826237	3/7	403013,406596,571368	irf9,socs3b,ifngr1
10_Member	Reactome Gene Sets	R-DRE-909733	Interferon alpha/beta signaling	-2.60522	-0.826237	3/7	403013,406596,571368	irf9,socs3b,ifngr1
11_Summary	Reactome Gene Sets	R-DRE-2162123	Synthesis of Prostaglandins (PG) and Thromboxanes (TX)	-2.60522	-0.826237	3/7	544666,559020,559148,447879,791754	ptges,ptgs2b,ptgis,nmrk2,parp14rs1
11_Member	Reactome Gene Sets	R-DRE-2162123	Synthesis of Prostaglandins (PG) and Thromboxanes (TX)	-2.60522	-0.826237	3/7	544666,559020,559148	ptges,ptgs2b,ptgis
11_Member	Reactome Gene Sets	R-DRE-196807	Nicotinate metabolism	-2.27717	-0.692796	4/17	447879,559020,559148,791754	nmrk2,ptgs2b,ptgis,parp14rs1
11_Member	Reactome Gene Sets	R-DRE-197264	Nicotinamide salvaging	-2.11247	-0.608711	3/10	559020,559148,791754	ptgs2b,ptgis,parp14rs1
12_Summary	Reactome Gene Sets	R-DRE-391903	Eicosanoid ligand-binding receptors	-2.25329	-0.692796	3/9	795679,100329613,100329657	si:dkey-42l23.2,hcar1-4,ltb4r
12_Member	Reactome Gene Sets	R-DRE-391903	Eicosanoid ligand-binding receptors	-2.25329	-0.692796	3/9	795679,100329613,100329657	si:dkey-42l23.2,hcar1-4,ltb4r
13_Summary	Reactome Gene Sets	R-DRE-140534	Caspase activation via Death Receptors in the presence of ligand	-2.25329	-0.692796	3/9	373114,562317,768248	cflara,fadd,fas
13_Member	Reactome Gene Sets	R-DRE-140534	Caspase activation via Death Receptors in the presence of ligand	-2.25329	-0.692796	3/9	373114,562317,768248	cflara,fadd,fas
13_Member	Reactome Gene Sets	R-DRE-3371378	Regulation by c-FLIP	-2.25329	-0.692796	3/9	373114,562317,768248	cflara,fadd,fas
13_Member	Reactome Gene Sets	R-DRE-5218900	CASP8 activity is inhibited	-2.25329	-0.692796	3/9	373114,562317,768248	cflara,fadd,fas
13_Member	Reactome Gene Sets	R-DRE-69416	Dimerization of procaspase-8	-2.25329	-0.692796	3/9	373114,562317,768248	cflara,fadd,fas
13_Member	Reactome Gene Sets	R-DRE-5357769	Caspase activation via extrinsic apoptotic signalling pathway	-2.11247	-0.608711	3/10	373114,562317,768248	cflara,fadd,fas

## Sheet: 12hpi_down_GO
GroupID	Category	Term	Description	LogP	Log(q-value)	InTerm_InList	Genes	Symbols
1_Summary	GO Biological Processes	GO:0044272	sulfur compound biosynthetic process	-4.28904	-0.785036	5/68	334195,445818,559721,560020,791612,436833,678541,406496,767661	mat1a,cthl,chst3a,acss2l,mat2ab,gstk1,gstk4,aldoab,blvra
1_Member	GO Biological Processes	GO:0044272	sulfur compound biosynthetic process	-4.28904	-0.785036	5/68	334195,445818,559721,560020,791612	mat1a,cthl,chst3a,acss2l,mat2ab
1_Member	GO Biological Processes	GO:0006790	sulfur compound metabolic process	-4.05497	-0.785036	7/177	334195,436833,445818,559721,560020,678541,791612	mat1a,gstk1,cthl,chst3a,acss2l,gstk4,mat2ab
1_Member	GO Biological Processes	GO:0051186	cofactor metabolic process	-2.46389	0	7/329	334195,406496,436833,560020,678541,767661,791612	mat1a,aldoab,gstk1,acss2l,gstk4,blvra,mat2ab
2_Summary	GO Biological Processes	GO:0006575	cellular modified amino acid metabolic process	-4.16208	-0.785036	6/117	394103,436833,449677,572649,678541,794752	sardh,gstk1,cpt1b,bbox1,gstk4,ckmb
2_Member	GO Biological Processes	GO:0006575	cellular modified amino acid metabolic process	-4.16208	-0.785036	6/117	394103,436833,449677,572649,678541,794752	sardh,gstk1,cpt1b,bbox1,gstk4,ckmb
3_Summary	GO Biological Processes	GO:0006082	organic acid metabolic process	-4.13912	-0.785036	13/617	324188,393108,394103,394133,406496,445818,449677,559721,560020,563642,569245,751707,799957	cyp26b1,cyp2p6,sardh,aldh4a1,aldoab,cthl,cpt1b,chst3a,acss2l,sdsl,cyp2ad3,acsf2,cyp2ad6
3_Member	GO Biological Processes	GO:0006082	organic acid metabolic process	-4.13912	-0.785036	13/617	324188,393108,394103,394133,406496,445818,449677,559721,560020,563642,569245,751707,799957	cyp26b1,cyp2p6,sardh,aldh4a1,aldoab,cthl,cpt1b,chst3a,acss2l,sdsl,cyp2ad3,acsf2,cyp2ad6
3_Member	GO Biological Processes	GO:0043436	oxoacid metabolic process	-2.65531	-0.0423469	10/576	324188,394103,394133,406496,445818,449677,559721,560020,563642,751707	cyp26b1,sardh,aldh4a1,aldoab,cthl,cpt1b,chst3a,acss2l,sdsl,acsf2
3_Member	GO Biological Processes	GO:0019752	carboxylic acid metabolic process	-2.25908	0	9/552	324188,394103,394133,406496,445818,449677,560020,563642,751707	cyp26b1,sardh,aldh4a1,aldoab,cthl,cpt1b,acss2l,sdsl,acsf2
4_Summary	GO Biological Processes	GO:0043153	entrainment of circadian clock by photoperiod	-4.05937	-0.785036	3/15	83776,140633,101883856,571624	cry5,per2,si:ch1073-390k14.1,opn4a
4_Member	GO Biological Processes	GO:0043153	entrainment of circadian clock by photoperiod	-4.05937	-0.785036	3/15	83776,140633,101883856	cry5,per2,si:ch1073-390k14.1
4_Member	GO Biological Processes	GO:0009649	entrainment of circadian clock	-3.97107	-0.780318	3/16	83776,140633,101883856	cry5,per2,si:ch1073-390k14.1
4_Member	GO Biological Processes	GO:0009648	photoperiodism	-3.48414	-0.522448	3/23	83776,140633,101883856	cry5,per2,si:ch1073-390k14.1
4_Member	GO Biological Processes	GO:0042752	regulation of circadian rhythm	-2.97592	-0.12096	3/34	83776,140633,101883856	cry5,per2,si:ch1073-390k14.1
4_Member	GO Biological Processes	GO:0032922	circadian regulation of gene expression	-2.64952	-0.0423469	3/44	83776,140633,101883856	cry5,per2,si:ch1073-390k14.1
4_Member	GO Biological Processes	GO:0009416	response to light stimulus	-2.07048	0	4/135	83776,140633,571624,101883856	cry5,per2,opn4a,si:ch1073-390k14.1
5_Summary	GO Biological Processes	GO:0002286	T cell activation involved in immune response	-3.88862	-0.764817	3/17	30645,58113,336266,402884,494039,553553,30762,568405,563952	cd74b,cd74a,loxl3b,tlr21,c3a.6,cfd,mhc2dab,csf1rb,ccl34b.1
5_Member	GO Biological Processes	GO:0002286	T cell activation involved in immune response	-3.88862	-0.764817	3/17	30645,58113,336266	cd74b,cd74a,loxl3b
5_Member	GO Biological Processes	GO:0002285	lymphocyte activation involved in immune response	-3.54297	-0.528311	3/22	30645,58113,336266	cd74b,cd74a,loxl3b
5_Member	GO Biological Processes	GO:0002366	leukocyte activation involved in immune response	-2.93887	-0.116092	3/35	30645,58113,336266	cd74b,cd74a,loxl3b
5_Member	GO Biological Processes	GO:0002263	cell activation involved in immune response	-2.90294	-0.110132	3/36	30645,58113,336266	cd74b,cd74a,loxl3b
5_Member	GO Biological Processes	GO:0050776	regulation of immune response	-2.79444	-0.0808116	6/211	30645,58113,336266,402884,494039,553553	cd74b,cd74a,loxl3b,tlr21,c3a.6,cfd
5_Member	GO Biological Processes	GO:0002697	regulation of immune effector process	-2.64952	-0.0423469	3/44	30645,58113,336266	cd74b,cd74a,loxl3b
5_Member	GO Biological Processes	GO:0019882	antigen processing and presentation	-2.46597	0	3/51	30645,30762,58113	cd74b,mhc2dab,cd74a
5_Member	GO Biological Processes	GO:0002252	immune effector process	-2.43414	0	5/173	30645,58113,336266,494039,553553	cd74b,cd74a,loxl3b,c3a.6,cfd
5_Member	GO Biological Processes	GO:0050778	positive regulation of immune response	-2.35096	0	5/181	30645,58113,402884,494039,553553	cd74b,cd74a,tlr21,c3a.6,cfd
5_Member	GO Biological Processes	GO:0002682	regulation of immune system process	-2.26512	0	7/358	30645,58113,336266,402884,494039,553553,568405	cd74b,cd74a,loxl3b,tlr21,c3a.6,cfd,csf1rb
5_Member	GO Biological Processes	GO:0070374	positive regulation of ERK1 and ERK2 cascade	-2.03153	0	3/73	30645,58113,563952	cd74b,cd74a,ccl34b.1
6_Summary	GO Biological Processes	GO:0007517	muscle organ development	-3.82107	-0.755254	7/193	30181,64609,404040,564005,567402,567771,100001241,100005261	ptch2,atp1a2a,dab2,col6a4a,myo5b,col6a2,synpo2lb,jam2a
6_Member	GO Biological Processes	GO:0007517	muscle organ development	-3.82107	-0.755254	7/193	30181,64609,404040,564005,567402,567771,100001241	ptch2,atp1a2a,dab2,col6a4a,myo5b,col6a2,synpo2lb
6_Member	GO Biological Processes	GO:0061061	muscle structure development	-2.83082	-0.0923668	8/365	30181,64609,404040,564005,567402,567771,100001241,100005261	ptch2,atp1a2a,dab2,col6a4a,myo5b,col6a2,synpo2lb,jam2a
7_Summary	GO Biological Processes	GO:0042493	response to drug	-3.44996	-0.522448	7/222	140633,393108,449677,559395,569245,799957,100006328,334195,406496,560020,791612,100534759	per2,cyp2p6,cpt1b,slc7a10b,cyp2ad3,cyp2ad6,slc13a5b,mat1a,aldoab,acss2l,mat2ab,si:dkey-22n8.3
7_Member	GO Biological Processes	GO:0042493	response to drug	-3.44996	-0.522448	7/222	140633,393108,449677,559395,569245,799957,100006328	per2,cyp2p6,cpt1b,slc7a10b,cyp2ad3,cyp2ad6,slc13a5b
7_Member	GO Biological Processes	GO:0042738	exogenous drug catabolic process	-2.83423	-0.0923668	3/38	393108,569245,799957	cyp2p6,cyp2ad3,cyp2ad6
7_Member	GO Biological Processes	GO:0017144	drug metabolic process	-2.65799	-0.0423469	8/389	334195,393108,406496,560020,569245,791612,799957,100534759	mat1a,cyp2p6,aldoab,acss2l,cyp2ad3,mat2ab,cyp2ad6,si:dkey-22n8.3
7_Member	GO Biological Processes	GO:0006805	xenobiotic metabolic process	-2.41857	0	3/53	393108,569245,799957	cyp2p6,cyp2ad3,cyp2ad6
8_Summary	GO Biological Processes	GO:0055114	oxidation-reduction process	-3.34966	-0.459942	13/743	324188,336266,393108,394103,394133,449558,558239,569245,570457,572649,767661,793849,799957	cyp26b1,loxl3b,cyp2p6,sardh,aldh4a1,dhdh.2,si:ch211-113j14.1,cyp2ad3,aox6,bbox1,blvra,bco2a,cyp2ad6
8_Member	GO Biological Processes	GO:0055114	oxidation-reduction process	-3.34966	-0.459942	13/743	324188,336266,393108,394103,394133,449558,558239,569245,570457,572649,767661,793849,799957	cyp26b1,loxl3b,cyp2p6,sardh,aldh4a1,dhdh.2,si:ch211-113j14.1,cyp2ad3,aox6,bbox1,blvra,bco2a,cyp2ad6
9_Summary	GO Biological Processes	GO:0001503	ossification	-2.71463	-0.0423469	4/89	30181,259260,324188,561970	ptch2,mst1,cyp26b1,adgrg6
9_Member	GO Biological Processes	GO:0001503	ossification	-2.71463	-0.0423469	4/89	30181,259260,324188,561970	ptch2,mst1,cyp26b1,adgrg6
10_Summary	GO Biological Processes	GO:0051017	actin filament bundle assembly	-2.3731	0	3/55	393743,548602,100001241	fscn2b,myoc,synpo2lb
10_Member	GO Biological Processes	GO:0051017	actin filament bundle assembly	-2.3731	0	3/55	393743,548602,100001241	fscn2b,myoc,synpo2lb
10_Member	GO Biological Processes	GO:0061572	actin filament bundle organization	-2.26697	0	3/60	393743,548602,100001241	fscn2b,myoc,synpo2lb
11_Summary	GO Biological Processes	GO:0015711	organic anion transport	-2.04159	0	5/215	436640,449677,559395,567865,100006328	slc25a48,cpt1b,slc7a10b,slco4a1,slc13a5b
11_Member	GO Biological Processes	GO:0015711	organic anion transport	-2.04159	0	5/215	436640,449677,559395,567865,100006328	slc25a48,cpt1b,slc7a10b,slco4a1,slc13a5b

## Sheet: 12hpi_down_KEGG
GroupID	Category	Term	Description	LogP	Log(q-value)	InTerm_InList	Genes	Symbols
1_Summary	KEGG Pathway	dre04514	Cell adhesion molecules	-2.87482	-0.641852	5/137	30762,60635,368878,100005261,100333180	mhc2dab,cldn7b,si:busm1-266f07.2,jam2a,si:dkey-237i9.8
1_Member	KEGG Pathway	dre04514	Cell adhesion molecules	-2.87482	-0.641852	5/137	30762,60635,368878,100005261,100333180	mhc2dab,cldn7b,si:busm1-266f07.2,jam2a,si:dkey-237i9.8
1_Member	KEGG Pathway	ko04514	Cell adhesion molecules (CAMs)	-2.87482	-0.641852	5/137	30762,60635,368878,100005261,100333180	mhc2dab,cldn7b,si:busm1-266f07.2,jam2a,si:dkey-237i9.8
2_Summary	KEGG Pathway	dre01230	Biosynthesis of amino acids	-2.73264	-0.641852	4/88	334195,406496,563642,791612	mat1a,aldoab,sdsl,mat2ab
2_Member	KEGG Pathway	dre01230	Biosynthesis of amino acids	-2.73264	-0.641852	4/88	334195,406496,563642,791612	mat1a,aldoab,sdsl,mat2ab
2_Member	KEGG Pathway	ko01230	Biosynthesis of amino acids	-2.73264	-0.641852	4/88	334195,406496,563642,791612	mat1a,aldoab,sdsl,mat2ab
2_Member	KEGG Pathway	dre00270	Cysteine and methionine metabolism	-2.51545	-0.600758	3/49	334195,563642,791612	mat1a,sdsl,mat2ab
2_Member	KEGG Pathway	ko00270	Cysteine and methionine metabolism	-2.51545	-0.600758	3/49	334195,563642,791612	mat1a,sdsl,mat2ab
3_Summary	KEGG Pathway	dre05168	Herpes simplex virus 1 infection	-2.31101	-0.521257	5/185	30762,58113,140633,368878,494039	mhc2dab,cd74a,per2,si:busm1-266f07.2,c3a.6
3_Member	KEGG Pathway	dre05168	Herpes simplex virus 1 infection	-2.31101	-0.521257	5/185	30762,58113,140633,368878,494039	mhc2dab,cd74a,per2,si:busm1-266f07.2,c3a.6
3_Member	KEGG Pathway	ko05168	Herpes simplex infection	-2.31101	-0.521257	5/185	30762,58113,140633,368878,494039	mhc2dab,cd74a,per2,si:busm1-266f07.2,c3a.6

## Sheet: 12hpi_down_Reactome
GroupID	Category	Term	Description	LogP	Log(q-value)	InTerm_InList	Genes	Symbols
1_Summary	Reactome Gene Sets	R-DRE-71291	Metabolism of amino acids and derivatives	-3.53947	-0.345509	6/152	334195,394103,394133,563642,572649,794752	mat1a,sardh,aldh4a1,sdsl,bbox1,ckmb
1_Member	Reactome Gene Sets	R-DRE-71291	Metabolism of amino acids and derivatives	-3.53947	-0.345509	6/152	334195,394103,394133,563642,572649,794752	mat1a,sardh,aldh4a1,sdsl,bbox1,ckmb
2_Summary	Reactome Gene Sets	R-DRE-216083	Integrin cell surface interactions	-2.93887	-0.117395	3/35	554270,567771,571317,336266	col4a4,col6a2,thbs3b,loxl3b
2_Member	Reactome Gene Sets	R-DRE-216083	Integrin cell surface interactions	-2.93887	-0.117395	3/35	554270,567771,571317	col4a4,col6a2,thbs3b
2_Member	Reactome Gene Sets	R-DRE-1474290	Collagen formation	-2.83423	-0.117395	3/38	336266,554270,567771	loxl3b,col4a4,col6a2
2_Member	Reactome Gene Sets	R-DRE-1474244	Extracellular matrix organization	-2.11554	0	4/131	336266,554270,567771,571317	loxl3b,col4a4,col6a2,thbs3b
3_Summary	Reactome Gene Sets	R-DRE-211859	Biological oxidations	-2.56216	0	4/98	324188,334195,678541,100002993	cyp26b1,mat1a,gstk4,ugt5e1
3_Member	Reactome Gene Sets	R-DRE-211859	Biological oxidations	-2.56216	0	4/98	324188,334195,678541,100002993	cyp26b1,mat1a,gstk4,ugt5e1
3_Member	Reactome Gene Sets	R-DRE-156580	Phase II - Conjugation of compounds	-2.3956	0	3/54	334195,678541,100002993	mat1a,gstk4,ugt5e1
